# Supplementary material for: Relative Humidity Effect on the Formation of Highly Oxidized Molecules and New Particles during Monoterpene Oxidation
Source: Copernicus journal article supplement (doi:10.5194/acp-2018-898), 2018-09-10
Supplement: Supplementary file [file acp-2018-898-AC1-supplement.pdf]

## Responses to Reviewers' Comments on Manuscript ACPD-2018-898

### (Relative Humidity Effect on the Formation of Highly Oxidized Molecules and New Particles during Monoterpene Oxidation)

We are grateful for the reviewers' comments and we feel that our responses to these will greatly improve this manuscript. We have addressed the comments in the following paragraphs and made corresponding changes in the revised manuscript. Reviewer comments are shown as *blue italic text* followed by our responses. Changes are shown as underlined text in our responses and **highlighted** in the revised manuscript, the latter of which (along with supplemental information) is attached to the end of this document.

#### **Reviewer #1:**

*The authors describe experimental findings from the ozonolysis of  $\alpha$ -pinene, limonene and 3-carene from a flow through experiment conducted in the RH range of 3-90%. Runs have been carried out with the intention to study the RH-dependence of HOM formation of the terpenes and the resulting nucleation and particle growth. While HOM formation was found to be independent of RH, particle formation was clearly pushed back for rising RH. Some speculative explanations for that are presented. From my perspective, very interesting is the new transverse ionization inlet with the curtain gas unit, which could be an alternative to the commonly used Boulder-type inlet, as well as the experimental fact that HOM formation is totally free of water effects. I think that the manuscript meets the criteria for ACP and should be published in this journal. Some minor points should be considered before final acceptance is recommended:*

*1) Line 78-80: The authors mean that the intra-molecular H-shift, or RO<sub>2</sub> isomerization, is characterized by a noticeable barrier making this unimolecular step clearly faster with rising temperature. I think it's not good to say "autoxidation" has a barrier. Autoxidation stands more for the whole process.*

Response: Thanks for the suggestion. We revised the original text accordingly: "The autoxidation of RO<sub>2</sub> includes intramolecular hydrogen shifts and O<sub>2</sub> additions. Several repetitions of the autoxidation cycle lead to a rapid increase in oxygen content as well as a decrease in saturation vapor pressure. Autoxidation was widely observed in condensed phase reactions, however, it was not considered in the gas phase previously due to the perception of a high barrier for the intramolecular hydrogen shift. This was confirmed by the fact that at higher temperatures, more HOMs are formed than at low temperatures (Frege et al., 2018)."

Modeling studies now show that intramolecular hydrogen shifts are fast enough to compete with bimolecular sink reactions (Kurtén , et al., 2015).”

*2) Line 85-86: The Boulder-type nitrate-CIMS by Eisele and Tanner does not suffer from a general problem with water vapour. Only in the case of relatively high RH in the reaction gas water cluster formation during gas expansion can disturb the analysis. Otherwise it works fine. That should be clearly stated at this point. Or have the authors other observations?*

Response: We revised the original text accordingly: “HOM detection by the current commercially available CIMS inlet based on the design of Eisele and Tanner is subject to water cluster influence at high RH (Kürten et al., 2016).”

*3) Line 90: In abstract a RH range of 3-90% is stated, and here 0-90%.*

Response: Thanks for pointing this out. We confirm that the RH range in the manuscript is now consistently presented as 3-92%.

*4) Line 114: It would be fine to have a table that compares parameters of the TI inlet with those of the commonly used boulder-type inlet, e.g. reaction times of the IMR, flows, HNO<sub>3</sub> concentrations, TIC, detection limits, an estimate of wall losses for RO<sub>2</sub>s and closed-shell products, etc. Spectra of the same reaction gas recorded with both inlets would provide an impression how good the TI inlet works. Maybe the authors should think about a separate paper describing the TI inlet in detail. Could be important for the community.*

Response: Thanks for the suggestion. We revised the text accordingly: “The calibration factors, defined as  $C = [H_2SO_4]/([HSO_4^-]/[NO_3^-])$  (Eisele and Tanner, 1993), for the TI in this position and the commercial inlet were  $3.25 \times 10^{10}$  molecules  $cm^{-3}$  and  $1.41 \times 10^{10}$  molecules  $cm^{-3}$ , respectively. The lower calibration factor for the TI inlet is attributed to the shorter reaction time (~80 ms) compared to the commercial inlet (~200 ms). We note that the reaction time of the TI inlet can be further increased by positioning the ion source assembly further upstream relative to the inlet orifice, which would require a slight modification of the current design. The total ion counts (TIC) of the TI inlet are more than 5 times higher than the commercial inlet, which we attribute to the more direct path of ions through the ion source as well as the use of a  $Po^{210}$  radioactive source as compared to the soft X-ray in the commercial nitrate inlet. The limit of detection (LOD) for sulfuric acid, which is defined as three times the standard deviation of the background (Jokinen et al., 2012), is  $9.3 \times 10^4$

molecules cm<sup>-3</sup> and 1.26×10<sup>5</sup> molecules cm<sup>-3</sup> for the TI and commercial inlets, respectively.”

With this revision, we have provided the information necessary to interpret our observations and thus we feel that a table is not necessary. However we will consider the reviewer’s suggestion to perform additional characterizations of the TI inlet as well as comparisons to the “Boulder-type” inlet as part of a more detailed, future study.

*5) Line 223: Can the authors derive HOM yields as a result of their experiments?*

Response: An accurate estimate of the HOM yields requires several parameters, many of which must be experimentally determined and are not essential for addressing the main objectives of this study. The transmission efficiency in the TOF vacuum chamber must be determined. While some studies use the transmission curve published in previous literature (Heinritzi et al., 2016), we note that this can change significantly according to voltage settings applied to the TOF mass spectrometer. Another key parameter is the ionization efficiency for each compound, which can vary greatly for the HOM observed in this study: for example, NO<sub>3</sub><sup>-</sup> based chemical ionization is reported to have relatively lower sensitivity to the OH-related RO<sub>2</sub> radicals compared to O<sub>3</sub>-related RO<sub>2</sub> radicals (Berndt et al., 2016). Since we do not want to compromise our results by providing estimates that are based on many uncertain parameters, we have decided not to include yields in this manuscript and instead focus primarily on mechanism elucidation.

*6) Line 228-229: Reaction of OH-derived RO<sub>2</sub> radicals, C<sub>10</sub>H<sub>17</sub>O<sub>x</sub>, with HO<sub>2</sub> leads to H<sub>18</sub> products, ROOH.*

Response: The sentence was revised as: “As observed in previous studies, C<sub>10</sub>H<sub>15</sub>O<sub>6,8,10,12</sub> and C<sub>10</sub>H<sub>17</sub>O<sub>5,7,9,11</sub> comprised the O<sub>3</sub>- and OH-related RO<sub>2</sub>, respectively (Jokinen et al., 2014). C<sub>10</sub>H<sub>14</sub>O<sub>5,7,9,11</sub> comprised the O<sub>3</sub>-related closed shell monomers, while C<sub>10</sub>H<sub>16</sub>O<sub>6,8,10,12</sub> and C<sub>10</sub>H<sub>18</sub>O<sub>6,7</sub> comprised the OH-related closed shell monomers (Ehn et al., 2014; Berndt et al., 2016).”

*7) Line 258: Figure S5 should be given in the main body along with Fig.8. From my perspective, total SOA mass is almost water-independent within the experimental errors in the whole RH arrange while particle number drops down by a factor of two.*

Response: We agree that the total SOA mass is almost water-independent. We revised the

text related to SOA mass generation accordingly: “SOA mass concentrations remains relatively constant”. However, as also stated in the manuscript: “The variability in particle mass concentration as a function of RH for different experiments can be attributed to combined effects of gas phase reactions, condensed phase reactions, physical uptake of water, as well as the re-evaporation of semi-volatile compounds from the wall. We cannot accurately quantify these effects. As a result, although the measured SOA mass concentration remained relatively constant, we cannot draw accurate conclusions from this.”

In consideration of article length, we feel that Figure 8 adequately expresses the RH influence on aerosol generation. Figure S5 is more about the details of the experiments, so we think it would be more appropriate to put it in the supplementary information. To clarify the data plotted in Figure 8, we have modified a sentence in the main body to show the size ranges of the generated SOA: “Figure 8 shows the integrated SOA particle number and mass concentrations over the observed diameter range of 10 - 100 nm.” Later in that paragraph we state “Peaks in the particle number-size distributions were between 40 and 70 nm (Figure S5).”

*8) Line 319: Here, reagent ion dependent sensitivity for different product classes should be mentioned that could lead to different results for different reagent ions.*

Response: Thanks for the suggestion. The sentence was revised as: “This could be explained by a lower OH/O<sub>3</sub> ratio in our experiments, since unlike Berndt et al. we did not provide an extra source of OH to the flow tube. Also, Berndt and coauthors reported lower sensitivity of nitrate reagent ions to OH-related RO<sub>2</sub> compared to other reagent ions such as acetate.”

**Reviewer #2:**

*The study examines the influences of relative humidity (RH) on the formation of HOM and aerosol from the ozonolysis of three different monoterpenes. HOM have been shown to be central for particle formation over the last years, and therefore knowing their yields under different atmospherically relevant conditions is important. The influence of RH has clearly not been addressed in earlier studies, making this work timely and appropriate.*

*The paper is well-written and the presentation of results is clear and straight-forward. The strength of the paper lies in the finding that HOM yields do not change as a function of RH, and this analysis by itself makes the manuscript worthy of publishing in ACP. The results and subsequent discussion on number and mass formation seem much more speculative. Overall,*

*I have several comments that the authors need to address before potential publication.*

*Major Comments:*

- 1. RH control. In section 2.1, the authors describe that the RH in flow tube was achieved by mixing a humidified and a dry flow. The humidified flow was 6.5 LPM while the total in the flow tube was 8.5 LPM. Assuming these flows were at the same temperature (which one would hope) when entering the flow tube, then even if the humidified flow was fully saturated at RH=100%, then the maximum achievable RH should be  $6.5/8.5 = 76\%$ . However, the authors state that the RH was probed up to 92%. I do not see how this is possible, unless the humidified flow indeed was several degrees warmer when entering the flow tube. If this were the case, it would not be surprising that particle number formation decreased, as nucleation is an extremely temperature sensitive process.*

Response: As stated in the text, we used a temperature-controlled bubbler to provide the humid air. The first three stages of RH were generated with the bubbler at room temperature, and the fourth stage (85-92%) was generated by heating the bubbler to ~35 °C. The reviewer is correct that the only way to achieve this RH by mixing flows is for the humid air to enter the chamber as a slightly higher temperature than the dry monoterpene flow. Assuming saturation of the humid flow, we estimate that the temperatures of the humid and dry flows were 26 °C and 20 °C, respectively, for the high RH stage only (note: due to the 1 LPM sample flow of the ozone analyzers, the humid and dry flows were actually 6 and 2.5 LPM, respectively). Due to turbulent mixing conditions produced at the inlet end of the flow tube, we expect that the gas temperature quickly reaches the room temperature for the experiments conducted at the highest RH. It is important to note that the first three RH stages were generated at room temperature and the bubbler was heated up only for the highest RH stage, yet particle number concentrations decreased monotonically with each level of RH increase. Nevertheless we cannot discount the influence of temperature in the last RH stage experiments, so we have added the following text: “In order to achieve the highest relative humidity stage, the temperature of the humid flow was saturated at 26 °C before being mixed with room temperature air from the monoterpene source. This resulted in a slightly higher temperature at the inlet of the flow tube, which could contribute to lower nucleation rates (Burkholder et al., 2007). Nevertheless, over the range of the first three humidity stages, up to 65% RH, the gas temperature was constant before, during, and after reaction.”

- 2. In Figure 6b, when RH is 0, the mass concentration is steadily increasing over the course*

*of nearly one hour. This is very surprising considering that the residence time in the flow tube is 1 minute. Clearly there is some memory effects, and this is not currently discussed at all in the manuscript. Accumulation of semi-volatile on walls is a common phenomenon, and can perhaps explain this behavior. Whatever the reason, it puts very high uncertainties on the results, considering that RH may influence the rate of (re-)evaporation from the walls. Are the measured SOA mass changes really significant when considering this?*

Response: We agree that there may be some memory effects and the semi-volatile species may accumulate and re-evaporate from the wall. The re-evaporation rate could be affected by RH, and if true then this would have some influence on the measured SOA mass concentration. As we mentioned in the paper, this effect is not quantitatively evaluated in our current work. In fact, as we mentioned in the paper, the measured mass concentration likely depends on this effect plus gas phase reactions, gas-particle partitioning, condensed phase reactions, and physical uptake of water. With all these effects and uncertainties, we cannot draw conclusions as to the measured SOA mass concentrations. We have added some sentences in the paper to clarify this: “The variability in particle mass concentration as a function of RH for different experiments can be attributed to combined effects of gas phase reactions, condensed phase reactions, physical uptake of water, as well as the re-evaporation of semi-volatile compounds from the wall. We cannot accurately quantify these effects. As a result, although the measured SOA mass concentration remained relatively constant, we cannot draw conclusions from this observation. In contrast, while particle number concentrations may also be affected by the factors mentioned above, they decreased by a factor of 2~3 with increasing RH.”

It is important to note, however, that this phenomenon does not impact our conclusions regarding HOM generation. As shown in section 3.6, almost all the main compounds are ELVOCs or LVOCs, which were not likely to re-evaporate from the wall.

*3. Particle number concentration was in excess of  $1e6\text{ cm}^{-3}$ . At such high concentrations, couldn't nucleation “shut down” at a certain point just because the condensation sink starts to overwhelm the collisions between nucleating agents? Alternatively, the ultimately measured particle number might mainly be limited by coagulation between newly nucleated clusters/particles. While I am not an expert on nucleation, the extreme particle number concentration raise many questions about how far the absolute values can be compared directly, as done by the authors.*

Response: We agree that nucleation can “shut down” at a certain point because the

condensation sink starts to overwhelm the collisions between nucleating species. This is the reason we only detected the larger particles (10-100 nm) instead of the nucleation mode particles (<10 nm) at the end of the flow tube. It's very likely that new particle formation only happens at the entrance to the flow tube, while new particles formed at later stages will coagulate with the existing larger particles very quickly. Following this, particle number concentrations decrease due to coagulation and wall loss. The particle coagulation coefficient and wall loss coefficient are simple physical parameters and are well known to be unaffected by H<sub>2</sub>O. The peak sizes in particle size distributions do not change much under different RH, especially in experiments without OH scavenger (Figure S5). As a result, we assume the particle coagulation term and wall loss term have linear effects on the particle number concentration for different RH. Based on these, the observed decreases in final particle number concentration with increasing RH should reflect the trend in new particle formation rate at different RH. Therefore we feel there is sufficient justification to compare number concentrations at different RH.

We have addressed this issue by confirming the following: (1) while absolute number concentrations are being referred to in the text, the conclusions drawn from the comparisons acknowledge the uncertainties associated with their changes, e.g., stating that concentrations change by factors of “2~3” rather than exact calculated values; (2) we remind the reader that changes in number concentration with RH can also be due to many of the factors that contribute to changes in mass concentration by including the following statement: “In contrast, while particle number concentrations may also be affected by the factors mentioned above, they decreased by a factor of 2~3 with increasing RH.”

*4. Related to the previous point, the authors state that since the aerosol surface area is so much lower than the flow tube wall area, the dominant loss term for HOM will be wall loss. This statement seems completely illogical. How are the particles even formed in the flow tube if all ELVOC or LVOC would condense on the walls? The authors need to calculate the actual condensation sink (CS) produced by the particles and I think they will find that the lifetime of HOM due to CS is on the order of seconds, While wall loss will be a slower process. Calculating a coagulation sink in addition might also help address my earlier comment in nr 3.*

Response: We thank the reviewer for pointing out this oversight. Following the reviewer's guidance, we realized that the comparison between the wall surface area and particle surface

area cannot represent the relative importance of wall loss rate and condensation rate onto particles. We have calculated the condensation sink (CS) (Kulmala et al., 2001) and wall loss rate (W) (Crump and Seinfeld, 1981; Kürten et al., 2014) using the following equation:

$$CS = 2\pi D \sum_{d_p} \beta_{M,d_p} dp N_{d_p}$$

$$W = \frac{2}{\pi} \cdot \frac{A_{chamber}}{V_{chamber}} \cdot \sqrt{k_e \cdot D}$$

Where,  $\beta_{M,d_p}$  is the transition correction factor; D is the diffusion coefficient of H<sub>2</sub>SO<sub>4</sub>, 8.5E-6 m<sup>2</sup> s<sup>-1</sup>;  $A_{chamber}$  and  $V_{chamber}$  are the surface area and volume of the chamber;  $k_e$  is the eddy diffusion coefficient, which we use an empirical value of 0.001 s<sup>-1</sup>.

The manuscript was revised as: “The condensation sink (CS) and wall loss rate for a compound with diffusion coefficient of 8.5×10<sup>-6</sup> m<sup>2</sup> s<sup>-1</sup> (e.g., sulfuric acid) were estimated using established methods (Kürten et al., 2014; Crump and Seinfeld, 1981; Kulmala et al., 2001). The calculated CS varied between 0.1-3.5 s<sup>-1</sup> in different SOA generation experiments, much larger than the wall loss rate (< 0.01 s<sup>-1</sup>). There was about 5-30% variation in CS in each SOA generation experiment from RH=3% to 92%. This amount of variation in CS does not seem to have a noticeable influence on the final concentration of HOMs. To further test the hypothesis that variations in condensation sink do not impact final HOM concentrations, particle free experiments were performed and, again, detected HOM concentrations did not change with RH (Figure 7).”

5. *Section 3.6 discusses volatility estimated of HOM. However, it seems the authors are not aware of the work by Kurtén et al. (2016), entitled “α-Pinene Autoxidation Products May not Have Extremely Low Saturation Vapor Pressures Despite High O:C Ratios”. This work certainly needs to be discussed in conjunction with this section, as it raises considerable doubts about the applicability of SIMPOL to vapor pressure estimated of HOM. Using SIMPOL in this work is still completely appropriate, but the large uncertainties should be noted, Also other parts of section 3.6 are questionable, but primarily the authors need to revisit the discussion about oxidation state OSc. The formula they utilize (2\*O:C-H:C) is not applicable in the case that molecules contain (hydro) peroxide functionalities. And according to Table S1, the authors assume this is the case for every molecule under discussion. This will require rewriting all parts where OSc is discussed.*

Response: Thanks for the suggestions. We were aware that the saturation vapor pressure



predicted from SIMPOL model may deviate from the real value. There are a lot of uncertainties not only from the method itself but also from simplification methods we used to estimate the functional groups. We revised the paper as “It has to be noted that the group contribution methods very likely underestimate the volatility of the  $\alpha$ -pinene autoxidation products due to ignoring intramolecular H-bonding (Kurtén et al., 2016). There may be large uncertainties in SIMPOL method as well as in our functional group estimation process. As a comparison, the Molecular Corridor method (Li et al., 2016), which does not require information on functional groups, was used to estimate the saturation vapor pressure as well.”

We agree that the existence of (hydro)peroxide functional groups will cause the  $\overline{OS}_C$  to deviate from  $\overline{OS}_C$  calculated with this formula ( $2*O:C-H:C$ ). The reason is that the oxygen atoms normally have an oxidation state of -2 in most of the functional groups, but have an oxidation state of -1 in (hydro)peroxide groups. Although the deviations from the formula ( $2*O:C-H:C$ ) was small (within 0.1) in some cases, the (hydro)peroxide may have a bigger influence on  $\overline{OS}_C$  if they are present in relatively higher abundance (Kroll et al., 2011), as in our case. We revised the manuscript as: “The average carbon oxidation state ( $\overline{OS}_C$ ) was calculated with Equation 3, in replacement of the commonly used formula ( $\overline{OS}_C = 2O:C - H:C$ ), as the second oxygen atom in (hydro)peroxide group does not increase the carbon oxidation state. In equation 3,  $n_O$ ,  $n_C$ , and  $n_H$  are the oxygen, carbon, and hydrogen numbers in the molecule;  $n_{(hydro)peroxide}$  is the number of (hydro)peroxide groups in the molecule.

$$\overline{OS}_C = \frac{2n_O - n_{(hydro)peroxide} - n_H}{n_C} \quad \text{(Equation 3)}'$$

The values in Table S1 and Figure 9 were changed accordingly.

#### *Minor Comments*

6. *Section 2.1 describes the flow tube setup, but the description is in many places unclear and ambiguous. For the flows, 0.5 LPM is diluted by 6.5 LPM and then mixed with 2.5 LPM. This adds up to 9.5 LPM. But the total flow was apparently 8.5 LPM? There also seems to be different types of zero air used, although they are named the same. Is some of it bottled synthetic air? Finally, the author should clarify “Gas inlets to the flow tube were made from Teflon tubing that were capped and drilled with small wholes” better, since as written, it remains unclear to me exactly how this part of the setup looked.*

Response: We agree that the description of the flows was a little confusing. The O<sub>3</sub> analyzers

each require 1 LPM sample air, so this is why the total flow became 8.5 LPM. All of the zero air was generated by the zero air generator (model 737-30, Aadco Instruments). The diffusers consisted of capped ¼” Teflon tubes with ~1 mm holes drilled in the last ~2 cm of the tubes, and is based on the apparatus described and modeled in Ball et al. (1999).

In order to clarify the description we have rewritten the flow tube description as follows:

For these experiments, dry “zero air” was generated with a zero air generator (model 747-30, Aadco Instruments), with NO<sub>x</sub> and SO<sub>2</sub> concentrations each specified to be less than 0.5 ppbv. The monoterpenes were injected into the flow tube using a syringe pump (model NE-300, New Era Pump Systems, Inc.) evaporated into a 2.5 LPM flow of dry zero air. O<sub>3</sub> was generated by passing 0.5 LPM dry zero air (79% N<sub>2</sub>, 21% O<sub>2</sub>) over a Hg UV lamp (model 90-0004-04, UVP, LLC) and then diluted with 6.5 LPM of humidity-controlled zero air. A temperature-controlled bubbler filled with deionized water was used to generate humid air, and the prescribed RH was achieved by controlling the temperature of the bubbler. An ozone analyzer, described below, sampled at 1 LPM, resulting in a total flow rate of 8.5 LPM and a corresponding reaction time of ~60 s for each experiment. Gas inlets to the flow tube were made from 0.64 cm outside diameter Teflon tubes that were capped and drilled with ~1 mm holes to distribute sample air uniformly into the flow tube, as described and modeled in Ball, et al. (1999).

*7. There is variability in earlier literature about how to write the plural HOM. In some cases also the plural is “HOM”, while in other studies they are “HOMs”. However, the usage in many places in this work seems questionable. “HOMs dimers”, “HOMs volatility”, “HOMs production”, etc, sound incorrect to me, and HOM should not be in plural form in these cases.*

Response: Thanks. All the “HOMs dimers”, “HOMs monomers”, “HOMs volatility”, “HOMs production”, “HOMs products”, “HOMs formation”, “HOMs generation”, “HOMs partitioning”, “HOMs concentration”, “HOMs spectrum”, “HOMs abundance”, “HOMs signals” were changed to “HOM ...”.

*8. In the conclusion, lines 378-383 present various ways through which water could affect HOM formation, but then this is following by a sentence saying that none of them actually take place. Are those lines really needed, or are they just more likely to confuse a reader?*

Response: Line 378-383 is a summary of the possible water-influencing pathways. We feel it

is important to introduce these to the reader in order to understand the discussion that systematically analyzes each possible pathway (Line 383-393). Without this introduction, we feel that it would be harder for the reader to understand the context of our analysis.

*9. Line 139, the inlet flow to the mass spectrometer is given as 0,5 LPM, but is it not closer to 0.7 LPM? This is given in some earlier studies, and is closer to the theoretical value for a 0.3 mm orifice.*

Response: The inlet flow was not directly measured, but was subtracted from all the TI inlet flows by all the outlet flows and therefore is subject to measurement uncertainties (which is why we use the approximate symbol “~” in describing the flow). The important point of this section of the text is that the curtain flow exceeded the flow into the mass spectrometer, so we will accept the reviewer’s suggestion and replace “~0.5” with the more generally-accepted “~0.7”.

*10. Line 304. This is not a very clear sentence, but if I understand correctly, the hydroperoxide should be an alcohol?*

Response: Yes! “hydroperoxide” was revised as “hydroxyl”.

*11. Figure 3. The legend says “upstram”.*

Response: Thanks, corrected.

*12. Figure 4 need larger axis labels.*

Response: Thanks, revised.

*13. Figure 6c. The legend for the liens is incorrect. O3 radicals are given twice, as are OH monomers. They should be mixed.*

Response: Thanks, corrected.

*14. Figure 9. The molecule in blue in the top-most box: is the keto form more commonly depicted than the enol form given here ?*

Response: As suggested by the reviewer, we checked the literature and found that the aldehyde form is more commonly depicted than the enol form. We changed the related structure in Figure 9 and the volatility prediction accordingly.

*15. There are references to “Kurten at al (2012)” and “Kuerten et al (2016)”. As these, to my understanding, are the same person, they should be spelled the same.*

Response: Thanks for the correction. All of “Kürten, Andreas” are uniformed as “Kürten”;

All of “Kurtén, Theo” are uniformed as “Kurtén”.

*16. While the likelihood of misunderstandings about what particles are studied here is low, the word “aerosol” is not used before in section 2.3. I suggest to include it at least once at a much earlier stage.*

Response: Thanks for the suggestion. The term “SOA” was introduced in the abstract as well as the introduction. The sentence in the abstract is “The ozonolysis of  $\alpha$ -pinene, limonene, and  $\Delta^3$ -carene, with and without OH-scavenger, were carried out under low NO<sub>x</sub> conditions under a range of RH (from ~3% to ~92%) in a temperature-controlled flow tube to generate secondary organic aerosol (SOA)”. We also corrected the first reference to SOA in the introduction (line 85) to “... secondary organic aerosol (SOA)”.

**Reviewer #3:**

*The Manuscript describes the RH effects on HOMs formed from oxidation reactions (ozone and OH) of monoterpenes and on the SOA formation. The authors used HRTOF-CIMS to measure gas phase HOMs (monomer and dimers). The main conclusion is that because HOMs are not affected by RH under the present experimental conditions, formation pathways of HOMs may not include water. The review believes this is a reasonable explanation, considering that the autoxidation reactions take place in the condensed phase and at high temperatures, where water is less available. Considering the increasingly important roles of HOMs in NPF and SOA formation, this conclusion is useful to the community.*

*Since the measured particles sizes in this study are between 20-100nm, it would be difficult to discuss the contribution of RH on NPF from these sizes. It is more likely that the precursors of nucleation (or NPF) and 20-100 nm particles have different volatilities and they may be even different precursors. Therefore, the RH effects on these aerosol particles are different from what the community considers regarding to RH effects on NPF (started in Introduction). Rather, the results shown here indicate the effects on SOA formation. So, I would suggest reorganize Introduction and results/discussion to focus on HOMs. Since RH varies in a large range in the atmosphere, it is still important to understand the effects of RH on HOMs formation.*

Response: We agree with the reviewer that it is not correct to associate the formation rate of ~20 nm diameter particles with NPF rates, and we have been careful to avoid such comparisons. We do feel, however, that the observed trends in total particle number do reflect trends in NPF, once we have accounted for effects such as coagulation and wall losses. See our comments to Reviewer 2, Comment 3, above describing how we have addressed such effects. To summarize, we can assume that particle coagulation and wall loss are monotonically related to particle number concentration for different RH (that is, each

increases with increased number concentration and neither is greatly affected by RH). Based on this, the observed decreases in final particle number concentration with increasing RH should reflect the trend in new particle formation rate at different RH. Therefore we feel there is sufficient justification to associate changes in overall number concentrations with NPF.

*(1) Line 38-42: The Amazon NPF or lack of it has little to do with RH, rather it is due to high condensation sink or the lack of nucleation precursors.*

Response: As suggested by the reviewer, the Amazon example was removed.

*(2) Line 60: Include Yu, H., (2012). "Effect of amines on the formation of sub-3 nm particles and their subsequent growth." Geophys. Res. Lett. 39: Doi: 10.1029/2011gl050099.*

Response: Thanks, the recommended reference was added.

*(3) Section 2.4. Indicate the exact equation that is used to calculate saturation mass concentrations ( $C^*$ ). Later, it is stated that the functional groups are also considered, so it would be useful to show the calculation procedure.*

Response: The functional groups used for calculation was summarized in Table S1. As suggested by the reviewer, the calculation equation was added in the caption of Table S1:

"The equation used for volatility calculation is  $\log_{10} P_{L,i}^0(T) = \sum_k v_{k,i} b_k(T)$ , where  $P_{L,i}^0(T)$  is the liquid vapor pressure of the compound.  $v_{k,i}$  is the number of groups of type k, and  $b_k(T)$  is the contribution by each group of type k. (Pankow and Asher, 2008)".

*(4) Line 210: What is the source of e5 /cc of sulfuric acid?*

Response: The trace amount of H<sub>2</sub>SO<sub>4</sub> is generated by OH oxidation of SO<sub>2</sub>. There is always a trace amount of SO<sub>2</sub> in the zero air, and the ozonolysis process will generate some OH radical in the experiments without OH scavenger which will lead to formation of H<sub>2</sub>SO<sub>4</sub>. To clarify this, we have edited the sentence in question as follows: [H<sub>2</sub>SO<sub>4</sub>], which arises from the oxidation of trace amounts of SO<sub>2</sub> in the aero air, was ~105 molecules cm<sup>-3</sup> and was always less than 3% of the most abundant C<sub>10</sub> products, suggesting that sulfuric acid plays a negligible role in nucleation and cluster growth in our experiments.

*(5) Line 231: Dimers are more abundant from OH oxidation. This is an interesting result, considering that HOMs formed from ozonolysis are found mostly during the nighttime, where NPF does not take place. So this may explain the importance of dimers on aerosol nucleation.*

Response: In our manuscript, we indicate that C<sub>20</sub>H<sub>32</sub>O<sub>6-13</sub> generation is more abundant in

experiments without OH-scavenger, as compared to experiments with OH scavenger. This is because some of the  $C_{20}H_{32}O_x$  is generated by the bimolecular reaction between an OH-derived  $RO_2$  ( $C_{10}H_{15}O_{2n}$ ) and an  $O_3$ -derived  $RO_2$  ( $C_{10}H_{17}O_{2m+1}$ ). We cannot conclude that dimer formation from OH chemistry is more than from  $O_3$  chemistry, because there are other dimers formed, e.g.,  $C_{20}H_{30}O_x$ . Also, because we didn't perform the OH-only chemistry, we cannot compare the yield of OH and  $O_3$  chemistry directly.

However, we did find that: “For the HOM products with identical  $\overline{O\bar{S}c}$ , OH-derived HOMs have lower volatilities than  $O_3$ -derived HOMs due to a greater number of (hydro) peroxide groups. As a result, OH chemistry is suspected to be more likely to lead to NPF than  $O_3$  chemistry, given the same level of oxidants and VOCs precursors.”

*(6) Lines 251-252: Show condensation sink, instead of surface area. The size distribution shows aerosol sizes are 20-100 nm, so condensation actually takes place effectively.*

Response: Thanks for the suggestion. Following the reviewer's guidance and that of Reviewer 2 (see our response to Question 4), we realized that the comparison between the wall surface area and particle surface area cannot represent the relative importance of wall loss rate and condensation (on particles) rate. The manuscript was revised as: “The condensation sink (CS) and wall loss rate for a compound with diffusion coefficient of  $8.5 \times 10^{-6} \text{ m}^2 \text{ s}^{-1}$  (e.g., sulfuric acid) were estimated using established methods (Kürten et al., 2014; Crump and Seinfeld, 1981; Kulmala et al., 2001). The calculated CS varied between  $0.1\text{-}3.5 \text{ s}^{-1}$  in different SOA generation experiments, much larger than the wall loss rate ( $< 0.01 \text{ s}^{-1}$ ). There was about 5-30% variation in CS in each SOA generation experiment from RH=3% to 92%. This amount of variation in CS does not seem to have a noticeable influence on the final concentration of HOMs. To further test the hypothesis that variations in condensation sink do not impact final HOM concentrations, particle free experiments were performed and, again, detected HOM concentrations did not change with RH (Figure 7).”

*(7) Lines 260-261: Indicate yields.*

Response: The sentence was revised as: “The generated SOA particle number and mass concentrations for limonene ( $2.2\text{-}6.0 \times 10^6 \text{ cm}^{-3}$  for number concentrations and  $470\text{-}1025 \mu\text{g m}^{-3}$  for mass concentrations) were  $\sim 3\text{-}12$  times greater than for  $\Delta^3$ -carene ( $0.3 - 2.0 \times 10^6$

cm<sup>-3</sup> for number concentrations and 56-86 µg m<sup>-3</sup> for mass concentrations) and α-pinene (0.4 - 2.2 × 10<sup>6</sup> cm<sup>-3</sup> for number concentrations and 61-130 µg m<sup>-3</sup> for mass concentrations).”

*(8)Line 306: Decomposition to C5 HOMs. Is this new?*

Response: The detection of C5-C9 HOMs during pinene oxidation is not new. As reported by Ehn and his coauthors (Ehn et al., 2012), C<sub>5</sub>H<sub>6</sub>O<sub>7</sub> is abundant in α-pinene oxidation, as well as some C7 - C9 fragments. However, the formation pathways were unclear. In our manuscript, we just gave a possible formation pathway of C5 - C9 – there may be other fragmentation pathways that we have not considered and that should be the focus of future studies.

## References cited

- Ball, S. M., Hanson, D. R., Eisele, F. L., and McMurry, P. H.: Laboratory studies of particle nucleation: Initial results for H<sub>2</sub>SO<sub>4</sub>, H<sub>2</sub>O, and NH<sub>3</sub> vapors, *J Geophys Res-Atmos*, 104, 23709-23718, 10.1029/1999jd900411, 1999.
- Berndt, T., Richters, S., Jokinen, T., Hyttinen, N., Kurtén, T., Otkjær, R. V., Kjaergaard, H. G., Stratmann, F., Herrmann, H., and Sipilä, M.: Hydroxyl radical-induced formation of highly oxidized organic compounds, *Nature communications*, 7, 13677, 2016.
- Burkholder, J. B., Baynard, T., Ravishankara, A. R., and Lovejoy, E. R.: Particle nucleation following the O<sub>3</sub> and OH initiated oxidation of alpha-pinene and beta-pinene between 278 and 320 K, *J Geophys Res-Atmos*, 112, 10.1029/2006jd007783, 2007.
- Crump, J. G., and Seinfeld, J. H.: TURBULENT DEPOSITION AND GRAVITATIONAL SEDIMENTATION OF AN AEROSOL IN A VESSEL OF ARBITRARY SHAPE, *J Aerosol Sci*, 12, 405-415, 10.1016/0021-8502(81)90036-7, 1981.
- Ehn, M., Kleist, E., Junninen, H., Petäjä, T., Lönn, G., Schobesberger, S., Maso, M. D., Trimborn, A., Kulmala, M., and Worsnop, D.: Gas phase formation of extremely oxidized pinene reaction products in chamber and ambient air, *Atmos Chem Phys*, 12, 5113-5127, 2012.
- Ehn, M., Thornton, J. A., Kleist, E., Sipilä, M., Junninen, H., Pullinen, I., Springer, M., Rubach, F., Tillmann, R., Lee, B., Lopez-Hilfiker, F., Andres, S., Acir, I.-H., Rissanen, M., Jokinen, T., Schobesberger, S., Kangasluoma, J., Kontkanen, J., Nieminen, T., Kurtén, T., Nielsen, L. B., Jorgensen, S., Kjaergaard, H. G., Canagaratna, M., Dal Maso, M., Berndt, T., Petaja, T., Wahner, A., Kerminen, V.-M., Kulmala, M., Worsnop, D. R., Wildt, J., and Mentel, T. F.: A large source of low-volatility secondary organic aerosol, *Nature*, 506, 476-+, 10.1038/nature13032, 2014.
- Eisele, F. L., and Tanner, D. J.: Measurement of the gas-phase concentration of H<sub>2</sub>SO<sub>4</sub> and methane sulfonic-acid and estimates of H<sub>2</sub>SO<sub>4</sub> production and loss in the atmosphere, *J Geophys Res-Atmos*, 98, 9001-9010, 10.1029/93jd00031, 1993.

- Heinritzi, M., Simon, M., Steiner, G., Wagner, A. C., Kuerten, A., Hansel, A., and Curtius, J.: Characterization of the mass-dependent transmission efficiency of a CIMS, *Atmos Meas Tech*, 9, 1449-1460, 10.5194/amt-9-1449-2016, 2016.
- Jokinen, T., Sipila, M., Junninen, H., Ehn, M., Lonn, G., Hakala, J., Petaja, T., Mauldin, R. L., Kulmala, M., and Worsnop, D. R.: Atmospheric sulphuric acid and neutral cluster measurements using CI-API-TOF, *Atmos Chem Phys*, 12, 4117-4125, 2012.
- Jokinen, T., Sipilä, M., Richters, S., Kerminen, V. M., Paasonen, P., Stratmann, F., Worsnop, D., Kulmala, M., Ehn, M., and Herrmann, H.: Rapid autoxidation forms highly oxidized RO<sub>2</sub> radicals in the atmosphere, *Angewandte Chemie International Edition*, 53, 14596-14600, 2014.
- Kroll, J. H., Donahue, N. M., Jimenez, J. L., Kessler, S. H., Canagaratna, M. R., Wilson, K. R., Altieri, K. E., Mazzoleni, L. R., Wozniak, A. S., Bluhm, H., Mysak, E. R., Smith, J. D., Kolb, C. E., and Worsnop, D. R.: Carbon oxidation state as a metric for describing the chemistry of atmospheric organic aerosol, *Nature Chemistry*, 3, 133-139, 10.1038/nchem.948, 2011.
- Kulmala, M., Dal Maso, M., Makela, J. M., Pirjola, L., Vakeva, M., Aalto, P., Miikkulainen, P., Hameri, K., and O'Dowd, C. D.: On the formation, growth and composition of nucleation mode particles, *Tellus B*, 53, 479-490, 10.1034/j.1600-0889.2001.d01-33.x, 2001.
- Kürten, A., Jokinen, T., Simon, M., Sipila, M., Sarnela, N., Junninen, H., Adamov, A., Almeida, J., Amorim, A., Bianchi, F., Breitenlechner, M., Dommen, J., Donahue, N. M., Duplissy, J., Ehrhart, S., Flagan, R. C., Franchin, A., Hakala, J., Hansel, A., Heinritzi, M., Hutterli, M., Kangasluoma, J., Kirkby, J., Laaksonen, A., Lehtipalo, K., Leiminger, M., Makhmutov, V., Mathot, S., Onnela, A., Petaja, T., Praplan, A. P., Riccobono, F., Rissanen, M. P., Rondo, L., Schobesberger, S., Seinfeld, J. H., Steiner, G., Tome, A., Troestl, J., Winkler, P. M., Williamson, C., Wimmer, D., Ye, P., Baltensperger, U., Carslaw, K. S., Kulmala, M., Worsnop, D. R., and Curtius, J.: Neutral molecular cluster formation of sulfuric acid-dimethylamine observed in real time under atmospheric conditions, *P Natl Acad Sci USA*, 111, 15019-15024, 10.1073/pnas.1404853111, 2014.
- Kürten, A., Bergen, A., Heinritzi, M., Leiminger, M., Lorenz, V., Piel, F., Simon, M., Sitals, R., Wagner, A. C., and Curtius, J.: Observation of new particle formation and measurement of sulfuric acid, ammonia, amines and highly oxidized organic molecules at a rural site in central Germany, *Atmos Chem Phys*, 16, 12793-12813, 10.5194/acp-16-12793-2016, 2016.
- Kurtén, T., Tiusanen, K., Roldin, P., Rissanen, M., Luy, J.-N., Boy, M., Ehn, M., and Donahue, N.:  $\alpha$ -Pinene Autoxidation Products May Not Have Extremely Low Saturation Vapor Pressures Despite High O:C Ratios, *The Journal of Physical Chemistry A*, 120, 2569-2582, 10.1021/acs.jpca.6b02196, 2016.
- Li, Y., Poeschl, U., and Shiraiwa, M.: Molecular corridors and parameterizations of volatility in the chemical evolution of organic aerosols, *Atmos Chem Phys*, 16, 3327-3344, 10.5194/acp-16-3327-2016, 2016.
- Pankow, J. F., and Asher, W. E.: SIMPOL. 1: a simple group contribution method for predicting vapor pressures and enthalpies of vaporization of multifunctional organic compounds, *Atmos Chem Phys*, 8, 2773-2796, 2008.



# 1 **Relative Humidity Effect on the Formation of Highly Oxidized Molecules and** 2 **New Particles during Monoterpene Oxidation**

3 Xiaoxiao Li<sup>1,2</sup>, Sabrina Chee<sup>1</sup>, Jiming Hao<sup>2</sup>, Jonathan P. D. Abbatt<sup>3</sup>, Jingkun Jiang<sup>2\*</sup>, and James N.  
4 Smith<sup>1\*</sup>

5 <sup>1</sup>Chemistry Department, University of California, Irvine, CA 92697, USA

6 <sup>2</sup>State Key Joint Laboratory of Environment Simulation and Pollution Control, School of Environment, Tsinghua University,  
7 Beijing, 100084, China

8 <sup>3</sup>Department of Chemistry, University of Toronto, Toronto, Canada

9 \*: *Correspondence to:* J. N. Smith (jimsmith@uci.edu) and J. Jiang (jiangjk@tsinghua.edu.cn)

10 **Abstract.** It has been widely observed around the world that the frequency and intensity of new particle formation (NPF)  
11 events are reduced during periods of high relative humidity (RH). The current study focuses on how RH affects the formation  
12 of highly oxidized molecules (HOMs), which are key components of NPF and initial growth caused by oxidized organics. The  
13 ozonolysis of  $\alpha$ -pinene, limonene, and  $\Delta^3$ -carene, with and without OH-scavenger, were carried out under low NO<sub>x</sub> conditions  
14 under a range of RH (from ~3% to ~92%) in a temperature-controlled flow tube to generate secondary organic aerosol (SOA).  
15 A Scanning Mobility Particle Sizer (SMPS) was used to measure the size distribution of generated particles and a novel  
16 transverse-ionization chemical ionization inlet with a high-resolution time-of-flight mass spectrometer detected HOMs. A  
17 major finding from this work is that neither the detected HOMs nor their abundance changed significantly with RH, which  
18 indicates that the detected HOMs must be formed from water-independent pathways. In fact, the distinguished OH- and  
19 O<sub>3</sub>-derived peroxy radicals (RO<sub>2</sub>), HOM monomers, and HOM dimers could mostly be explained by the autoxidation of RO<sub>2</sub>  
20 followed by bimolecular reactions with other RO<sub>2</sub> or hydroperoxy radicals (HO<sub>2</sub>), rather than from a water-influenced pathway  
21 like through the formation of a stabilized Criegee intermediate (sCI). However, as RH increased from ~3% to ~92%, the total  
22 SOA number concentrations decreased by a factor of 2-3 while SOA mass concentrations remains relatively constant. These  
23 observations show that, while high RH appears to inhibit NPF as evident by the decreasing number concentration, this  
24 reduction is not caused by a decrease in RO<sub>2</sub>-derived HOM formation. Possible explanations to these phenomena were  
25 discussed.

## 26 27 **1 Introduction**

28 New particle formation (NPF) is ubiquitous around the world (Kulmala et al., 2004). Newly formed particles contribute  
29 greatly to global particle populations and can grow further to act as cloud condensation nuclei (CCN), thereby influencing  
30 clouds and climate (Makkonen et al., 2012; Merikanto et al., 2009; Dunne et al., 2016). NPF characteristics vary from site to

31 site because of varying precursors and atmospheric conditions. It has been widely observed that the intensity (Sihto et al.,  
32 2006; Dada et al., 2017) and frequency (Dada et al., 2017; Boy and Kulmala, 2002; Hyvönen et al., 2005) of continental NPF  
33 are reduced during periods of high RH, resulting in reduced ultrafine particle number concentrations during these periods  
34 (Weber et al., 1997). For example, 20 years of observations in the boreal forest at Hyytiälä, Finland, showed that NPF is  
35 more likely to happen during periods of low ambient RH (Dada et al., 2017). In urban areas, NPF also favors low RH (Cai et  
36 al., 2017; Shen et al., 2011). Despite the low continental NPF event frequency at high RH, NPF has still been observed in the  
37 free troposphere in vicinity of clouds, where RH is extremely high (Weber et al., 1999) and in coastal and marine areas  
38 where RH is typically greater than 90% (O'Dowd et al., 1998).

39  
40 The widely observed anti-correlation between NPF and RH in the field experiments can be attributed to the indirect  
41 influence of water. For example, high RH often corresponds to greater cloud cover, which can lead to lower ground-level  
42 concentrations of photo-oxidized precursors such as H<sub>2</sub>SO<sub>4</sub> and HOMs as well as an increased condensation sink that leads to  
43 scavenging of precursors and clusters (Hamed et al., 2011). On the other hand, water vapor may also directly influence NPF  
44 by regulating the formation of gas phase precursors or by participating in cluster formation. For example, chamber and  
45 model experiments on the binary sulfuric acid-water system have demonstrated positive relationships between particle  
46 formation rate and RH (Duplissy et al., 2016; Merikanto et al., 2016). While in the ternary (H<sub>2</sub>SO<sub>4</sub>/MSA-H<sub>2</sub>O-Amine/NH<sub>3</sub>)  
47 system, H<sub>2</sub>O was reported to have either positive (Chen et al., 2015) or negative (Napari et al., 2002) effects on NPF. Some  
48 studies have hypothesized that high water content might suppress the formation of NPF-related organics from the oxidation  
49 of biogenic precursors (Hyvönen et al., 2005; Boy and Kulmala, 2002). However, no direct evidence of this has been  
50 provided.

51  
52 Although sulfuric acid has been recognized as the most important precursor of new particle formation, it alone can't explain  
53 the rapid formation and growth rates observed in the field (Kuang et al., 2008). Organic compounds, ammonia, amines, and  
54 water are also likely involved (Zhang et al., 2012; Chen et al., 2012; Yu et al., 2012). Organics have been shown to be very  
55 important for cluster formation and stabilization in theoretical studies (Ortega et al., 2016; Donahue et al., 2013), laboratory  
56 experiments (Tröstl et al., 2016; Schobesberger et al., 2013) and field measurements (Bianchi et al., 2016; Hoffmann et al.,  
57 2001; Metzger et al., 2010). Organics can either form clusters with sulfuric acid or purely with themselves (Zhao et al., 2013;  
58 Zhao et al., 2009). They can also contribute significantly to the condensational growth of newly formed particles,  
59 determining particle growth rates, particle lifetime, and global particle and CCN concentrations (Donahue et al., 2011;  
60 Vehkamäki and Riipinen, 2012). The ability of organics to take part in particle formation and condensational growth depends

61 on their volatility as well as reactivity. HOMs, such as extremely low volatility organic compounds (ELVOCs, saturation  
62 mass concentration ( $C^*$ )  $< 3 \times 10^{-4} \mu\text{g m}^{-3}$ ) or low volatility organic compounds (LVOCs,  $3 \times 10^{-4} < C^* < 0.3 \mu\text{g m}^{-3}$ ), are likely  
63 contributors to NPF (Donahue et al., 2012; Ehn et al., 2014).

64  
65 Despite its large contribution to NPF, the direct measurement of HOMs has long been a challenge because of their low  
66 atmospheric concentrations, low volatilities, and short lifetimes. Recently, the development of the high resolution  
67 time-of-flight chemical ionization mass spectrometer (HRTof-CIMS) overcame this barrier and made the measurement and  
68 identification of HOMs feasible (Junninen et al., 2010; Jokinen et al., 2012). HOMs from both monoterpene and aromatic  
69 oxidation showed high O/C ratios of  $>0.7 - 0.8$ , and were present as monomers, dimers and even higher order clusters  
70 (Molteni et al., 2018; Ehn et al., 2012). These high O/C ratios could not be explained by any of the formerly known  
71 oxidation pathways unless the autoxidation of  $\text{RO}_2$  was taken into consideration (Crouse et al., 2013; Barsanti et al.,  
72 2017). The autoxidation of  $\text{RO}_2$  includes intramolecular hydrogen shifts and  $\text{O}_2$  additions. Several repetitions of the  
73 autoxidation cycle lead to a rapid increase in oxygen content as well as a decrease in saturation vapor pressure. Autoxidation  
74 was widely observed in condensed phase reactions, however, it was not considered in the gas phase previously due to the  
75 perception of a high barrier for the intramolecular hydrogen shift. This was confirmed by the fact that at higher temperatures,  
76 more HOMs are formed than at low temperatures (Frege et al., 2018). Modeling studies now show that intramolecular  
77 hydrogen shifts are fast enough to compete with bimolecular sink reactions (Kurten et al., 2015).

78  
79 Since most laboratory experiments related to the formation of HOMs have been conducted under conditions of constant RH,  
80 usually low or medium RH of less than 60% (Ehn et al., 2012; Zhang et al., 2015), it was still unknown whether and how  
81 water vapor might impact HOM formation. High RH conditions are difficult to achieve in chamber experiments without  
82 significantly changing temperature and pressure. In addition, HOM detection by the current commercially available CIMS  
83 inlet based on the design of Eisele and Tanner is subject to water cluster influence at high RH (Kürten et al., 2016).

84  
85 In this research, three different endocyclic monoterpenes,  $\alpha$ -pinene, limonene and  $\Delta^3$ -carene were reacted with ozone, with  
86 and without hydroxyl radical (OH) scavengers, in a reaction flow tube to generate secondary organic aerosol (SOA). RH  
87 influences on HOM formation and organic-driven NPF were studied under a range of RH from  $\sim 3\%$  to  $\sim 92\%$ . Generated  
88 closed-shell HOMs and  $\text{RO}_2$  were measured using a home-built CIMS inlet coupled to a HRTof mass spectrometer (LTOF  
89 mass analyzer, ToFwerk AG). The CIMS inlet effectively reduced water clustering onto ions sampled into vacuum, thus  
90 removing sample artifacts caused by high water vapor levels. Water vapor influence on the formation of  $\text{RO}_2$ , HOM

91 monomers and HOM dimers were studied. The volatility of O<sub>3</sub>- and OH-derived closed-shell HOMs were estimated with a  
92 group contribution-based model (SIMPOL) and a recently developed statistical model to study the potential contribution of  
93 O<sub>3</sub> and OH initiated chemistry on NPF.

## 94 **2 Methods**

### 95 **2.1 Flow tube reactor**

96 The experiments were performed in a laminar flow tube reactor consisting of a 150 cm long Pyrex glass cylinder with a  
97 volume of 8.5 dm<sup>3</sup> (Figure 1). The flow tube was located in a temperature controlled room (T = 293 ± 2 °C) and was covered  
98 so that all experiments were performed under dark conditions. For these experiments, dry “zero air” was generated with a  
99 zero air generator (model 747-30, Aadco Instruments), with NO<sub>x</sub> and SO<sub>2</sub> concentrations each specified to be less than 0.5  
100 ppbv. The monoterpenes were injected into the flow tube using a syringe pump (model NE-300, New Era Pump Systems,  
101 Inc.) evaporated into a 2.5 LPM flow of dry zero air. O<sub>3</sub> was generated by passing 0.5 LPM dry zero air (79% N<sub>2</sub>, 21% O<sub>2</sub>)  
102 over a Hg UV lamp (model 90-0004-04, UVP, LLC) and then diluted with 6.5 LPM of humidity-controlled zero air. A  
103 temperature-controlled bubbler filled with deionized water was used to generate humid air, and the prescribed RH was  
104 achieved by controlling the temperature of the bubbler. An ozone analyzer, described below, sampled at 1 LPM, resulting in  
105 a total flow rate of 8.5 LPM and a corresponding reaction time of ~60 s for each experiment. Gas inlets to the flow tube were  
106 made from 0.64 cm outside diameter Teflon tubes that were capped and drilled with ~1 mm holes to distribute sample air  
107 uniformly into the flow tube, as described and modeled in Ball et al., (1999). The uniform distributions of O<sub>3</sub> and H<sub>2</sub>O in the  
108 flow tube were confirmed by measuring [O<sub>3</sub>] and RH at the different locations prior to the experiments. In every experiment,  
109 RH was adjusted to be constant for at least 30 min for each of the four RH steps (3-5%, 30-38%, 58-65%, 85-92%). In order  
110 to achieve the highest relative humidity stage, the temperature of the humid flow was saturated at 26 °C before being mixed  
111 with room temperature air from the monoterpene source. This resulted in a slightly higher temperature at the inlet of the flow  
112 tube, which could contribute to lower nucleation rates (Burkholder et al., 2007). Nevertheless, over the range of the first  
113 three humidity stages, up to 65% RH, the gas temperature was constant before, during, and after reaction. At the beginning  
114 of the experiments, the inner wall of the reactor was washed with ultra-pure water. All of the flow rates were calibrated  
115 before and during the experiments.

### 116 **2.2 Instrumentation**

#### 117 **2.2.1 Transverse Ionization – Chemical Ionization Mass Spectrometer**

118 A self-designed and home-built chemical ionization inlet, called Transverse Ionization (TI) inlet (Figure 2 and Figure S1),  
119 was used in front of the LTOF mass analyzer. The TI design is similar to those of the Ambient-pressure Proton transfer Mass

120 Spectrometer (AmPMS) (Hanson et al., 2011) and the cluster-CIMS (Zhao et al., 2010). In the TI inlet, a 4 - 10 LPM flow of  
121 sample air is passed across the inlet orifice of the mass spectrometer, where it encounters an orthogonal, 1 LPM reagent ion  
122 gas flow consisting  $N_2$  containing ionized nitrate ions ( $NO_3^-$ ) as well as potential cluster ions  $(HNO_3)_nNO_3$  with  $n = 1-3$ . For  
123 the current study, the sample flow to the inlet was set to 4.5 LPM. Chemical ionization occurs at atmospheric pressure and  
124 temperature. The reagent gas is generated by passing 3 ccm of  $N_2$  over a small vial containing nitric acid, which is then  
125 ionized by a 370 MBq  $Po^{210}$  radioactive source (model P-2021, NRD, LLC). An additional flow of  $N_2$  can be added to the  
126 reagent gas to change the reagent ion concentration, and the assembly can be adjusted to vary ion-molecule reaction time.  
127 The latter can be controlled by adjusting the sample and reagent gas flow rates or by applying different voltages to the  
128 ionization source and the main inlet block. To minimize the diffusion loss in sample lines, the inlet of the TI source was  
129 connected to the flow tube outlet by a short (~10 cm) piece of electro-polished stainless steel tubing. Compared to the widely  
130 used commercial nitrate inlet patterned after the design by Eisele and Tanner (1993) and marketed by Aerodyne, Inc., no  
131 additional sheath flow is required thus any impurities potentially introduced by the sheath flow are eliminated. Some flow  
132 disturbance may occur where the sample flow encounters the transverse reagent flow, which may lead to non-ideal behavior.  
133 However, even at the maximum total flow of 11 LPM, the reynolds number in this region is ~500 thus turbulence is not  
134 expected to be significant.

135  
136 Another unique aspect of the TI design is the use of an  $N_2$  curtain gas in front of the inlet orifice to the mass spectrometer to  
137 reduce water clustering on reagent and sample ions. Water clusters are expected to form at high RH mainly during the  
138 free-jet expansion of the sampled gas on the vacuum side of the orifice plate (Thomson and Iribarne, 1979). The presence of  
139 these clusters makes the identification and quantification of both sample and reagent ions challenging (Kulmala et al., 2014;  
140 Lee et al., 2014; Kürten et al., 2016; Ehn et al., 2014). Figure 2 shows the details of the TI source that address this issue.  
141 Small holes drilled in a radial channel blow  $N_2$  uniformly in front of the orifice plate so that only sampled ions and this clean  
142  $N_2$  gas pass into the vacuum chamber. Since the sampling flow rate of the mass spectrometer is ~0.7 LPM when using 0.3  
143 mm orifice, the  $N_2$  curtain flow is set to be 1 LPM to overflow the region surrounding the orifice. By applying voltages to  
144 the ion source and the block, the ions can be efficiently guided into the mass spectrometer while neutral molecules such as  
145 water vapor are prevented from entering by the  $N_2$  curtain gas.

146  
147 This TI inlet is suitable to all types of reagent ion chemistry, e.g.  $NO_3^-$ ,  $I^-$ , and  $H_3O^+$ . Nitrate ion chemistry was used as the  
148 reagent ion in these experiments, which is selective to highly oxidized molecules that have at least two hydroperoxy (-OOH)  
149 groups or some other H-bond-donating groups (Hytinen et al., 2015). HOM monomers, HOM dimers and highly oxidized

150 RO<sub>2</sub> radicals can also be measured using nitrate ion chemistry.

151

### 152 **2.2.2 Other measurements**

153 Ozone concentrations were measured with two ozone analyzers (model 106L, 2B Technology) at the inlet and outlet of the  
154 flow tube. The sampling flow of each analyzer is 1 LPM. The two ozone analyzers were intercompared prior to the  
155 experiments and the difference was within 5 ppbv when [O<sub>3</sub>] < 1000 ppbv. A Scanning Mobility Particle Sizer (SMPS),  
156 consisting of a Po210 bipolar neutralizer, a nano-Differential Mobility Analyzer (nano-DMA; model 3081, TSI, Inc.), and a  
157 condensation particle counter (MCPC; model 1720, Brechtel Manufacturing) were used to measure the number-size  
158 distribution of particles, which is later used to deduce the total particle number and mass concentrations (the latter assumes a  
159 uniform density for organic particles of 1.2 g cm<sup>-3</sup>). The sampling flow rate of the MCPC was 0.3 LPM and the sheath and  
160 excess flows of the nano DMA were set to 3 LPM. The flow tube particle number-size distribution was measured without  
161 further drying to get a more accurate measure of the actual particle surface area and volume, which are important for HOM  
162 partitioning, and also to prevent particle evaporation during the measurements.

163

### 164 **2.3 Experimental conditions**

165 Three monoterpenes were used in our experiments (see Table 1),  $\alpha$ -pinene, limonene and  $\Delta^3$ -carene. Oxidation by ozone is  
166 believed to dominate over other oxidation radicals (i.e., OH or NO<sub>3</sub>) in forming SOA under atmospheric conditions  
167 (Atkinson and Arey, 2003). Ozonolysis of alkenes generates a substantial amount of OH, leading to products that are  
168 produced by a combination of O<sub>3</sub> and OH oxidation. For some experiments, in order to isolate oxidation by O<sub>3</sub>, cyclohexane  
169 (see Table 1 for mixing ratios) was premixed with the monoterpene and added to the flow tube as an OH scavenger. For other  
170 experiments, the combination of OH and O<sub>3</sub> chemistry were investigated to study atmospheric oxidation chemistry more  
171 representative of ambient air. The “high concentration” experiments were conducted with similar mixing ratios of  
172 monoterpene (~1100ppb) and O<sub>3</sub> (~900ppb). The “low concentration” experiments were conducted to study the particle-free  
173 chemical processes with initial concentrations of monoterpenes and O<sub>3</sub> shown in Table 1. Since wall losses should be  
174 comparable for different precursors as a function of RH, it was not taken into consideration in our analysis of HOM  
175 production.

176

### 177 **2.4 HOM volatility predictions**

178 The SIMPOL.1 method (Pankow and Asher, 2008) and the molecular corridor method (Li et al., 2016) were used to predict  
179 the saturation mass concentrations (C\*) of some of the detected OH- and O<sub>3</sub>-related HOMs. SIMPOL.1 is a group

180 contribution method and requires information on molecular structure, while the molecular corridor method only requires the  
181 molecular formulae. Both methods are semi-empirical and based on volatility data from hundreds or thousands of  
182 compounds. The calculated volatilities were then applied to the two-dimensional volatility basis set (2D-VBS) (Donahue et  
183 al., 2012) to explore the likelihood that the products participate in the initial stages of nanoparticle growth.

184

### 185 3 Results and discussion

#### 186 3.1 TI-CIMS performance

187 When comparing the TI inlet with the commercial nitrate inlet in measuring  $\alpha$ -pinene ozonolysis products, both inlets  
188 produced identical mass spectra. The sensitivities of both inlets to  $H_2SO_4$  were determined using a home-built  $H_2SO_4$   
189 calibration system (Figure S2) based on the design of Kürten et al. (2012). Figure 3 summarizes the results of these  
190 calibrations. The position of the ion source assembly relative to the inlet orifice is critical for determining the sensitivity of  
191 the TI inlet. When the ion source is placed 0.5 cm upstream along the sample flow axis and 5 cm away from the inlet orifice  
192 along the reagent ion flow axis (configuration shown in Figure 2), the instrument is at its most sensitive. The calibration  
193 factors, defined as  $C = [H_2SO_4]/([HSO_4^-]/[NO_3^-])$  (Eisele and Tanner, 1993), for the TI in this position and the  
194 commercial inlet were  $3.25 \times 10^{10}$  molecules  $cm^{-3}$  and  $1.41 \times 10^{10}$  molecules  $cm^{-3}$ , respectively. The lower calibration factor  
195 for the TI inlet is attributed to the shorter reaction time (~80 ms) compared to the commercial inlet (~200 ms). We note that  
196 the reaction time of the TI inlet can be further increased by positioning the ion source assembly further upstream relative to  
197 the inlet orifice, which would require a slight modification of the current design. The total ion counts (TIC) of the TI inlet are  
198 more than 5 times higher than the commercial inlet, which we attribute to the more direct path of ions through the ion source  
199 as well as the use of a  $Po^{210}$  radioactive source as compared to the soft X-ray in the commercial nitrate inlet. The limit of  
200 detection (LOD) for sulfuric acid, which is defined as three times the standard deviation of the background (Jokinen et al.,  
201 2012), is  $9.3 \times 10^4$  molecules  $cm^{-3}$  and  $1.26 \times 10^5$  molecules  $cm^{-3}$  for the TI and commercial inlets, respectively.

202

203 After applying the  $N_2$  curtain gas flow, the TIC recorded by the TI-CIMS decreased significantly. This was compensated for  
204 by increasing the ion source and reaction chamber voltages that direct ions to the orifice (Figure S3). When  $RH \approx 90\%$ , the  
205 reagent ion mass spectrum was dominated by water clusters  $(H_2O)_m(HNO_3)_nNO_3^-$  ( $m = 0-30$ ,  $n = 0-2$ ) if no  $N_2$  curtain flow  
206 was applied (Figure 4a). The reagent ions  $NO_3^-$ ,  $HNO_3NO_3^-$  and  $(HNO_3)_2NO_3^-$  decreased as RH increased, with  
207  $[(HNO_3)_2NO_3^-]$  and  $[HNO_3NO_3^-]$  decreasing much faster than  $[NO_3^-]$ . In contrast, after 1 LPM  $N_2$  curtain flow was applied to  
208 the inlet, most of the water clusters were removed (Figure 4b). The reagent ions, sample ions and TIC remained stable as RH

209 increased, which resulted in a reliable measurement of HOM concentrations as a function of RH. The result that the N<sub>2</sub>  
210 curtain flow eliminated water clustering to a large extent confirms that most of the water clusters in the spectrum were  
211 produced during the free-jet expansion into vacuum instead of formed in the ion-molecular reagent region.

212

### 213 3.2 Identification of HOM spectrum

214 Figure 5 shows the average mass spectra of the HOM dimers and Figure S4 shows the average mass spectra of the HOM  
215 monomers and RO<sub>2</sub> radicals for each of the six particle generation experiments. More than 400 peaks were identified in each  
216 spectrum, the majority of which were clusters with NO<sub>3</sub><sup>-</sup> or HNO<sub>3</sub>NO<sub>3</sub><sup>-</sup>· [H<sub>2</sub>SO<sub>4</sub>], which arises from the oxidation of trace  
217 amounts of SO<sub>2</sub> in the aero air, was ~10<sup>5</sup> molecules cm<sup>-3</sup> and was always less than 3% of the most abundant C<sub>10</sub> products,  
218 suggesting that sulfuric acid plays a negligible role in nucleation and cluster growth in our experiments. After subtracting the  
219 reagent ions (NO<sub>3</sub><sup>-</sup> or HNO<sub>3</sub>NO<sub>3</sub><sup>-</sup>·), molecular formulae for organics with an odd number of H atoms were assigned to  
220 radicals, which are generally difficult to detect experimentally (Rissanen et al., 2015), and formulae with an even number of  
221 H atoms were assigned to closed-shell molecules. Most of the HOM products from the three endocyclic monoterpenes were  
222 very similar, while the relative abundance of different HOMs was quite different, indicating similar reaction pathways but  
223 different branching ratios in the reaction mechanisms. The main products were C<sub>5-10</sub>H<sub>6-16</sub>O<sub>3-10</sub> for closed shell monomers and  
224 RO<sub>2</sub> and C<sub>15-20</sub>H<sub>22-34</sub>O<sub>6-18</sub> for closed shell dimers. Among these, C<sub>10</sub> and C<sub>20</sub> compounds were the most abundant. C<sub>5-9</sub>  
225 products could be formed from O<sub>3</sub> attack on the less reactive exocyclic carbon double bond or the decomposition of  
226 intermediate radicals. Some fragments were found to be unique for specific monoterpene precursors. For instance, C<sub>5</sub>H<sub>6</sub>O<sub>7</sub>  
227 (m/z 240) was much more abundant in α-pinene oxidation than from other two precursors, which might be a tri-carboxylic  
228 acid (Ehn et al., 2012).

229

230 Comparing total HOM abundance for the three monoterpene oxidation reactions, limonene created the most, followed by  
231 α-pinene and then Δ<sup>3</sup>-carene. This is in qualitative agreement with prior studies (Jokinen et al., 2014; Ehn et al., 2014). The  
232 total dimer signal intensity was 15-30% of monomers for all three monoterpenes. Experiments with an OH scavenger  
233 generated fewer HOMs than those without OH scavengers.

234

235 As observed in previous studies, C<sub>10</sub>H<sub>15</sub>O<sub>6,8,10,12</sub> and C<sub>10</sub>H<sub>17</sub>O<sub>5,7,9,11</sub> comprised the O<sub>3</sub>- and OH-related RO<sub>2</sub>, respectively  
236 (Jokinen et al., 2014). C<sub>10</sub>H<sub>14</sub>O<sub>5,7,9,11</sub> comprised the O<sub>3</sub>-related closed shell monomers, while C<sub>10</sub>H<sub>16</sub>O<sub>6,8,10,12</sub> and C<sub>10</sub>H<sub>18</sub>O<sub>6,7</sub>  
237 comprised the OH-related closed shell monomers (Ehn et al., 2014; Berndt et al., 2016). When comparing the average  
238 spectra with and without OH scavenger, no obvious differences were seen for OH-related RO<sub>2</sub> or monomers (Figure S4). In



239 contrast, for dimers we found that  $C_{20}H_{32}O_{6-13}$  were more abundant in experiments without OH scavenger (Figure 5). The  
240 formation of these dimers can be explained by the reaction of one OH-related  $RO_2$  with one  $O_3$ -derived  $RO_2$  (see Section  
241 3.5), and can therefore be considered as markers for combined OH and  $O_3$  chemistry. As HOM dimers are generally less  
242 volatile than monomers with identical O/C ratio, rapid production of dimers is believed to play a more important role in  
243 initial particle formation and growth (Zhang et al., 2015).

244

### 245 3.3 RH influence on HOM generation

246 Figure 6 shows a time series of experimental parameters, particle size distribution, and key ions from the limonene  
247 ozonolysis experiment with OH scavenger (EXP. 2 in Table 1). The  $O_3$  inlet and outlet concentrations were approximately  
248 constant with increasing RH (Figure 6a), indicating that RH did not significantly change  $O_3$  levels in the flow tube. This also  
249 shows that the reactivity of the limonene with ozone does not change with RH. The number concentration of the generated  
250 particles decreased from  $4.9 \times 10^6 \text{ cm}^{-3}$  to  $2.7 \times 10^6 \text{ cm}^{-3}$  with increasing RH, while the peak of the number-size distribution  
251 increased slightly, due in part to water absorption. When RH was above 80%, both the integrated number and mass  
252 concentrations, which were calculated from the number-size distributions, decreased (Figure 6b).

253

254 Despite the change in particle number and mass concentrations with RH, the concentration of all the main HOMs, including  
255  $RO_2$ , monomers and dimers, did not change for both OH- and  $O_3$ -derived products (Figure 6c). In fact, the only signals in the  
256 mass spectra that changed with RH corresponded to an increases associated with water clusters. The variations in HOM  
257 concentrations can be explained by the competition between production and condensational losses. As almost all of the  
258 detected HOMs are ELVOCs or LVOCs (see Section 3.6), they are not likely to partition back to the gas phase after they  
259 encounter a surface. The condensation sink (CS) and wall loss rate for a compound with diffusion coefficient of  $8.5 \times 10^{-6} \text{ m}^2$   
260  $\text{s}^{-1}$  (e.g., sulfuric acid) were estimated using established methods (Kürten et al., 2014; Crump and Seinfeld, 1981; Kulmala et  
261 al., 2001). The calculated CS varied between 0.1-3.5  $\text{s}^{-1}$  in different SOA generation experiments, much larger than the wall  
262 loss rate ( $< 0.01 \text{ s}^{-1}$ ). There was about 5-30% variation in CS in each SOA generation experiment from RH = 3% to 92%.  
263 This amount of variation in CS does not seem to have a noticeable influence on the final concentration of HOMs. To further  
264 test the hypothesis that variations in condensation sink do not impact final HOM concentrations, particle free experiments  
265 were performed and, again, detected HOM concentrations did not change with RH (Figure 7).

266

### 267 3.4 RH influence on SOA generation

268 Figure 8 shows the integrated SOA particle number and mass concentrations over the observed diameter range of 10 - 100

269 nm. The generated SOA particle number and mass concentrations for limonene ( $2.2-6.0 \times 10^6 \text{ cm}^{-3}$  for number  
270 concentrations and  $470-1025 \mu\text{g m}^{-3}$  for mass concentrations) were ~3-12 times greater than for  $\Delta^3$ -carene ( $0.3-2.0 \times 10^6$   
271  $\text{cm}^{-3}$  for number concentrations and  $56-86 \mu\text{g m}^{-3}$  for mass concentrations) and  $\alpha$ -pinene ( $0.4-2.2 \times 10^6 \text{ cm}^{-3}$  for number  
272 concentrations and  $61-130 \mu\text{g m}^{-3}$  for mass concentrations). This is because the theoretical ozone reactivity of limonene is  
273 3~5 times higher than the latter two and molar yield from limonene ozonolysis is also the highest. Peaks in the particle  
274 number-size distributions were between 40 and 70 nm (Figure S5). In most of the experiments, generated SOA mass  
275 concentrations increased or decreased slightly when RH increased from ~0% to ~60% and decreased as RH further increased  
276 to ~90%. The variability in particle mass concentration as a function of RH for different experiments can be attributed to  
277 combined effects of gas phase reactions, condensed phase reactions, physical uptake of water, as well as the re-evaporation  
278 of semi-volatile compounds from the wall. We cannot accurately quantify these effects. As a result, although the measured  
279 SOA mass concentration remained relatively constant, we cannot draw conclusions from this observation. In contrast, while  
280 particle number concentrations may also be affected by the factors mentioned above, they decreased by a factor of 2~3 with  
281 increasing RH.

282 A number of studies have demonstrated different water and OH influences on the ozonolysis products of exocyclic and  
283 endocyclic organic compounds. They have reported either suppressing (Bonn et al., 2002; Bonn and Moorgat, 2002) or  
284 promoting (Jonsson et al., 2006; Jonsson et al., 2008) effects of water vapor on the particle formation processes during  
285 ozonolysis of monoterpenes by measuring the number-size distributions of generated SOA particles with SMPS. The  
286 discrepancies between different results could be attributed to the different experiment setups, e.g., monoterpene and  $\text{O}_3$   
287 concentration, temperature, RH range, OH scavengers, reaction time, and so on. Specifically, our results are in good  
288 agreement with those of Bonn et al., who studied SOA generation from the ozonolysis of endocyclic monoterpenes (Bonn et  
289 al., 2002). In that study, SOA number concentrations decreased by a factor of 1.1~2.5 as RH increased, while the variation in  
290 volume concentrations was negligible (within  $\pm 10\%$ ). They concluded that water's influence on non-volatile products, which  
291 are responsible for the initial steps of nucleation, was much larger than its influence for semi-volatile compounds which  
292 mainly determined the final volume concentrations of particles. Thus, it was highly suspected that water influenced new  
293 particle formation through influencing the generation of NPF precursors. However, our measurements indicate that at least  
294 the formation of the detected HOMs is independent of water vapor concentrations. There may be other species that are  
295 crucial to the initial steps of NPF and are affected by water vapor but are not detected by nitrate CIMS (see section 3.5).  
296 Another possible explanation is that a fraction of HOMs cluster with water at high RH in such a way that they may no longer  
297 be able to participate in further cluster formation, thereby suppressing NPF. If the CIMS measurement only detected the  
298 declustered molecule, then such a mechanism may still be consistent with our observations.

### 300 3.5 Possible formation pathways of water-relevant C<sub>10</sub> and C<sub>20</sub> HOMs

301 Although the oxidation of BVOCs has been widely studied, it has mostly been constrained to the early stages (first and  
302 second generation intermediates) and many uncertainties still exist (Johnson and Marston, 2008; Isaacman-VanWertz et al.,  
303 2018; Atkinson and Arey, 2003). The first step of ozonolysis for the three BVOCs ( $\alpha$ -pinene,  $\Delta^3$ -carene and limonene) is  
304 ozone attack on the endocyclic carbon double bond to form a primary ozonide. Figure 9 shows the O<sub>3</sub>-initiated oxidation  
305 pathways of  $\alpha$ -pinene that may be related to the detected C<sub>10</sub> and C<sub>20</sub> HOMs for representative isomers. The primary ozonide  
306 rapidly transforms to two excited Criegee intermediates (eCIs), one of which (branching ratio= 0.4) (Kamens et al., 1999) is  
307 shown in Figure 9. The reaction pathways of the eCI are complex, the most important two under ambient and most chamber  
308 conditions are the sCI channel (reaction I) and the hydroperoxide channel (reaction II) (Bonn et al., 2002). The sCI either  
309 reacts with aldehydes to form a secondary ozonide (when the aldehyde is C<sub>10</sub>, then the formed SOZ is C<sub>20</sub> and is marked as  
310 sCI-C<sub>10</sub>) or with water or other acidic compounds such as alcohols and carboxylic acids to form hydroxy-hydroperoxide,  
311 which then decomposes to carboxylic acids or aldehydes. For  $\alpha$ -pinene, the main decomposition product is pinonic acid. In  
312 the hydroperoxide channel (reaction II), the formed hydroperoxide quickly decomposes to a first generation alkyl radical (R)  
313 and OH (Johnson and Marston, 2008). R reacts with O<sub>2</sub> immediately to form the first generation RO<sub>2</sub>, which can undergo  
314 numerous reactions, including reaction with HO<sub>2</sub>, R'O<sub>2</sub> and autoxidation. The reaction with HO<sub>2</sub> mainly forms  
315 hydroperoxides, with a small fraction forming hydroxyl or carbonyl-containing compounds. When reacted with another R'O<sub>2</sub>,  
316 either ROOR' or an alkoxy radical (RO) or a carbonyl and a hydroxyl are formed. The RO can undergo isomerization, or  
317 form a carbonyl and HO<sub>2</sub>, for which the branching ratios are extremely difficult to evaluate. RO can also undergo  
318 decomposition, which is one of the pathways to form C<sub>5</sub>~C<sub>9</sub>. The autoxidation process is key to HOM formation. Each  
319 autoxidation step adds two O atoms to the molecule and thus increases the oxidation state very rapidly. The competition  
320 between autoxidation processes and bimolecular reactions (RO<sub>2</sub> reactions with R'O<sub>2</sub> or HO<sub>2</sub>) determines the ultimate  
321 oxidation state of the products (Barsanti et al., 2017; Crouse et al., 2013; Rissanen et al., 2015).

322  
323 OH can be generated in the ozonolysis of alkenes and the yield is near unity (Atkinson, 1997). The reaction of OH with  
324  $\alpha$ -pinene directly forms first generation R and then RO<sub>2</sub>; one possible structure for this RO<sub>2</sub> (branching ratio = 0.44), formed  
325 from OH addition to the double bond (Berndt et al., 2016), is shown in Figure 9. However, the formed RO<sub>2</sub> (C<sub>10</sub>H<sub>17</sub>O<sub>2m+1</sub>) are  
326 not the same RO<sub>2</sub> as those formed through ozonolysis (C<sub>10</sub>H<sub>15</sub>O<sub>2n+2</sub>) (McVay et al., 2016). Accordingly, the structure and  
327 composition of C<sub>10</sub> and C<sub>20</sub> HOMs formed from OH or O<sub>3</sub> chemistry are different, and so too are their potential impacts on  
328 NPF. The combined OH- and O<sub>3</sub>-derived dimers (C<sub>10</sub>H<sub>32</sub>O<sub>2(m+n)+3</sub>), formed by collision of an OH-derived RO<sub>2</sub> with an

329 O<sub>3</sub>-derived RO<sub>2</sub>, were only observed in ozonolysis experiments without OH scavenger.

330  
331 The RO<sub>2</sub> autoxidation pathway explains most of the observed C<sub>10</sub> and C<sub>20</sub> compounds in the mass spectra. One exception to  
332 this is that C<sub>10</sub>H<sub>18</sub>O<sub>2m+1</sub>, C<sub>10</sub>H<sub>18</sub>O<sub>2m</sub> and C<sub>20</sub>H<sub>34</sub>O<sub>2(m+m')</sub> were not observed in the spectrum whereas in experiments performed  
333 by Berndt et al., in which OH oxidation for  $\alpha$ -pinene was studied, C<sub>10</sub>H<sub>18</sub>O<sub>2m</sub> and C<sub>20</sub>H<sub>34</sub>O<sub>2(m+m')</sub> dominated the mass  
334 spectrum (Berndt et al., 2016). This could be explained by a lower OH/O<sub>3</sub> ratio in our experiments, since unlike Berndt et al.  
335 we did not provide an extra source of OH to the flow tube. Also, Berndt and coauthors reported lower sensitivity of nitrate  
336 reagent ions to OH-related RO<sub>2</sub> compared to other reagent ions such as acetate.

337  
338 Despite this close agreement achieved by the RO<sub>2</sub> autoxidation mechanism and the observed mass spectra in our study, prior  
339 studies suggest that other potential pathways cannot be excluded. An accretion product involving sCI is one possibility  
340 (Barsanti et al., 2017). It is possible that sCI reacts with long-chain carboxylic acids or carbonyls, such as those with 10  
341 carbon atoms, forming in this instance anhydrides (sCI-C<sub>10</sub>, reaction IV) or secondary ozonides (sCI-C<sub>10</sub>, reaction V) with  
342 vapor pressures lower than 10<sup>-15</sup> torr (Kamens et al., 1999; Tobias and Ziemann, 2001; Bonn et al., 2002). The formation of  
343 anhydride is more likely in condensed phase, whereas there is also a possibility it can also happen in gas phase (Kamens et  
344 al., 1999). However, it is unknown whether these sCI-C<sub>10</sub> can be detected using nitrate-CIMS as they may lack hydrogen  
345 bond donor moieties. The semi-volatile pinonic acid can also form HOMs after further oxidation by OH (Ehn et al., 2014),  
346 provided that excess  $\alpha$ -pinene is not present to compete with pinonic acid for the generated OH.

347  
348 Water vapor's influence on HOM formation can be direct or indirect. For monoterpene oxidation, the direct participation of  
349 water vapor is to react with sCI, favoring the formation of the hydroperoxide and its decomposition products (reaction III)  
350 over the secondary ozonides (sCI-C<sub>10</sub>, reaction IV) or possible anhydrides (sCI-C<sub>10</sub>, reaction V). Since the formation of  
351 sCI-C<sub>10</sub> is more likely to contribute to NPF than the products from sCI and water vapor (Kamens et al., 1999; Tobias et al.,  
352 2000), a decrease in low volatility sCI-C<sub>10</sub> with high RH could explain the decreasing SOA number concentrations in our  
353 experiment. It has been shown previously that OH yields from the reactions of O<sub>3</sub> with a series of monoterpenes were not  
354 affected by the presence of water vapor (Atkinson et al., 1992; Aschmann et al., 2002), which implies that the hydroperoxide  
355 channel (reaction II) are similarly unaffected by water. Since the detected HOMs in our experiments were RH-independent,  
356 we conclude that all the detected HOMs were formed from hydroperoxide channel (reaction II) and not via the sCI channel  
357 (reaction I). Similarly, the detected HOMs were not likely to form through the hydration reaction (Equation 1) (Ehn et al.,  
358 2012), which is supposed to increase with increasing RH.

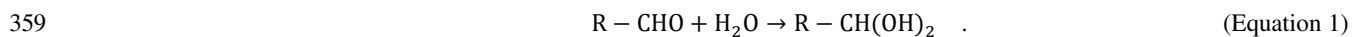

360  
 361 The indirect water effect on HOM formation includes the water influence on HO<sub>2</sub> fate. As water promotes HO<sub>2</sub> self-reaction  
 362 (Equation 2), reaction of HO<sub>2</sub> with RO<sub>2</sub> should decrease and the related HOM monomers should likewise decrease with  
 363 increasing RH. However, as the formation of both HOM monomers and dimers was not affected by H<sub>2</sub>O, it was likely that  
 364 water does not significantly increase HO<sub>2</sub> self-reaction or that HO<sub>2</sub> chemistry was not important in our experiments.

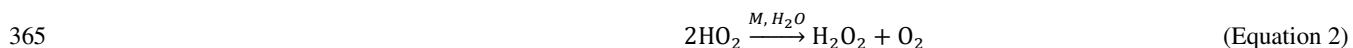

366  
 367 **3.6 Volatility predictions**

368 The volatility of the gas phase products is one of the most important properties that determines whether a compound  
 369 contributes to the formation, initial growth or further growth of SOA particles (Donahue et al., 2012; Kroll et al., 2011). As  
 370 the products with identical elemental composition can be formed from different bimolecular reactions of the intermediate  
 371 RO<sub>2</sub>, it is difficult to predict their exact structures. For the current study, the number of different structural and functional  
 372 groups (e.g., aromatic rings, aldehydes, ketones, hydroxyls, peroxides, hydro-peroxides) was estimated and used to derive  
 373 saturation vapor pressure using SIMPOL.1 (Table S1). To simplify the calculation, the functional groups used here were  
 374 directly predicted from the proposed formation pathways in Figure 10 and did not include intramolecular isomerization,  
 375 although that may be important in some situations. For example, one of the ROOH can be replaced with an endo-peroxide  
 376 via ring closure of unsaturated RO<sub>2</sub> (Berndt et al., 2016). It has to be noted that the group contribution methods very likely  
 377 underestimate the volatility of HOM product from  $\alpha$ -pinene autoxidation products due to ignoring intramolecular H-bonding  
 378 (Kurtén et al., 2016). There may be large uncertainties in SIMPOL method as well as in our functional group estimation  
 379 process. As a comparison, the Molecular Corridor method (Li et al., 2016), which does not require information on functional  
 380 groups, was used to estimate the saturation vapor pressure as well. The average carbon oxidation state ( $\overline{OS}_C$ ) was calculated  
 381 with Equation 3, in replacement of the commonly used formula ( $\overline{OS}_C = 2O : C - H : C$ ), as the second oxygen atom in (hydro)  
 382 peroxide group does not increase the carbon oxidation state. In equation 3,  $n_O$ ,  $n_C$ , and  $n_H$  are the oxygen, carbon, and  
 383 hydrogen numbers in the molecule;  $n_{(hydro)peroxide}$  is the number of (hydro) peroxide groups in the molecule.

384 
$$\overline{OS}_C = \frac{2n_O - n_{(hydro)peroxide} - n_H}{n_C} \quad \text{(Equation 3)}$$

385 Figure 10 shows the predicted saturation mass concentrations (C\*) of the main C<sub>10</sub> and C<sub>20</sub> closed shell products. The  
 386 difference of C\* predicted from the two methods was ~1-4 orders of magnitudes. Despite these differences, most of the C<sub>20</sub>  
 387 HOMs can be classified as ELVOCs, while C<sub>10</sub> products were mostly LVOCs. Typically, t for those compounds with

388 identical  $\overline{OSc}$ , such as  $C_{20}H_{30}O_{10}$  ( $O_3$ -derived dimer,  $\log_{10}(C^*)=-2.74$ ),  $C_{20}H_{32}O_{11}$  (OH and  $O_3$  combined dimer,  
389  $\log_{10}(C^*)=-5.11$ ),  $C_{20}H_{34}O_{12}$  (OH-derived dimer,  $\log_{10}(C^*)=-7.41$ ), OH-derived HOMs have lower volatilities than  
390  $O_3$ -derived HOMs due to a greater number of (hydro) peroxide groups.

391

#### 392 4 Conclusions

393 The RH influence on HOM formation and NPF during monoterpene oxidation was explored in this study. HOMs were  
394 detected with a TI-CIMS, using nitrate as reagent ions;  $C_{10}$  and  $C_{20}$  dominated the spectra. There are mainly three potential  
395 paths for water vapor influence on the formation of  $C_{10}$  and  $C_{20}$  HOMs. One is water reacting with sCI (Equation 1), thereby  
396 influencing the branching ratio between formation of more volatile compounds decomposed from hydroxyl hydroperoxide,  
397 such as pinonic acid, and accretion products with sCI such as secondary ozonide (sCI- $C_{10}$ ) and anhydride (sCI- $C_{10}$ ). The  
398 second hypothesized water influence is on the HOMs formed from hydration reactions (Equation 2). The third is that water  
399 increases the rate of self-reaction of  $HO_2$  (Equation 3), thus indirectly impacts the loss pathways of  $RO_2$ . Our experimental  
400 results, both with high particle loading and particle-free conditions, demonstrated that neither the detected HOM species nor  
401 their signal abundance changed significantly with RH. This indicates that the detected HOMs, which can mostly be  
402 explained by  $RO_2$  autoxidation, must be formed from water-independent pathways rather than by those reactions mentioned  
403 above. One implication of this result is that  $HO_2$  self-reaction was not significantly promoted by water or that the  $RO_2$   
404 reaction with  $HO_2$  was not be significant in our system, but instead that  $RO_2$  reacts with another peroxy radical,  $R'O_2$ , to  
405 generate both closed shell monomers and dimers. Another implication is that the sCI pathway is not responsible for the  
406 generation of the detected HOMs while the role of sCI-related HOMs (SOZ or anhydride) formation by accretion with long  
407 chain products, which may not be detected with nitrate CIMS, may be important in causing the decrease in SOA number  
408 concentrations with increased RH. Another possible explanation for the decreasing SOA number concentration is that water  
409 may cluster with HOMs and suppress NPF.

410

411 The detected HOMs, which could mostly be explained by autoxidation of  $RO_2$  followed by reactions with  $R'O_2$  or  $HO_2$ , were  
412 distinguished as OH-related,  $O_3$ -related  $RO_2$ , closed shell HOM monomers, and HOM dimers. The volatility of the identified  
413 products were estimated with the SIMPOL.1 group contribution method and with the molecular corridor technique. That  
414 analysis confirmed that  $C_{20}$  closed shell products have significantly lower volatility compared to  $C_{10}$  products and are thus  
415 more likely to contribute to NPF. For the HOM products with identical  $\overline{OSc}$ , OH-derived HOMs have lower volatilities than  
416  $O_3$ -derived HOMs due to a greater number of (hydro) peroxide groups. As a result, OH chemistry is suspected to be more

417 likely to lead to NPF than O<sub>3</sub> chemistry, given the same level of oxidants and VOCs precursors.

418

## 419 **Acknowledgements**

420 This research was supported by the US Department of Energy's Atmospheric System Research program under grant no.  
421 DESC0014469, the US National Science Foundation under grant no. AGS-1762098, and by the National Key R&D Program  
422 of China under grant no. 2017YFC0209503. XL thanks the financial support from the State Scholarship Fund managed by  
423 Chinese Scholarship Council (CSC). We thank Hayley Glicker, Deanna Caroline Myers, Michael Lawler, and Danielle  
424 Draper for their kind help.

425

## 426 **References**

- 427 Andreae, M. O., Afchine, A., Albrecht, R., Holanda, B. A., Artaxo, P., Barbosa, H. M., Borrmann, S., Cecchini, M. A., Costa,  
428 A., and Dollner, M.: Aerosol characteristics and particle production in the upper troposphere over the Amazon Basin, *Atmos*  
429 *Chem Phys*, 18, 921-961, 2018.
- 430 Aschmann, S. M., Arey, J., and Atkinson, R.: OH radical formation from the gas-phase reactions of O<sub>3</sub> with a series of  
431 terpenes, *Atmos Environ*, 36, 4347-4355, 10.1016/s1352-2310(02)00355-2, 2002.
- 432 Atkinson, R., Aschmann, S. M., Arey, J., and Shorees, B.: Formation of OH radicals in the gas phase reactions of O<sub>3</sub> with a  
433 series of terpenes, *Journal of Geophysical Research: Atmospheres*, 97, 6065-6073, 1992.
- 434 Atkinson, R.: Gas-phase tropospheric chemistry of volatile organic compounds: 1. Alkanes and alkenes, *Journal of Physical*  
435 *and Chemical Reference Data*, 26, 215-290, 1997.
- 436 Atkinson, R., and Arey, J.: Gas-phase tropospheric chemistry of biogenic volatile organic compounds: a review, *Atmos*  
437 *Environ*, 37, 197-219, 2003.
- 438 Ball, S. M., Hanson, D. R., Eisele, F. L., and McMurry, P. H.: Laboratory studies of particle nucleation: Initial results for  
439 H<sub>2</sub>SO<sub>4</sub>, H<sub>2</sub>O, and NH<sub>3</sub> vapors, *J Geophys Res-Atmos*, 104, 23709-23718, 10.1029/1999jd900411, 1999.
- 440 Barsanti, K. C., Kroll, J. H., and Thornton, J. A.: Formation of Low-Volatility Organic Compounds in the Atmosphere:  
441 Recent Advancements and Insights, *Journal of Physical Chemistry Letters*, 8, 1503-1511, 10.1021/acs.jpcllett.7b02969, 2017.
- 442 Berndt, T., Richters, S., Jokinen, T., Hyttinen, N., Kurtén, T., Otkjær, R. V., Kjaergaard, H. G., Stratmann, F., Herrmann, H.,  
443 and Sipilä, M.: Hydroxyl radical-induced formation of highly oxidized organic compounds, *Nature communications*, 7,  
444 13677, 2016.
- 445 Bianchi, F., Tröstl, J., Junninen, H., Frege, C., Henne, S., Hoyle, C. R., Molteni, U., Herrmann, E., Adamov, A., and  
446 Bukowiecki, N.: New particle formation in the free troposphere: A question of chemistry and timing, *Science*, aad5456,  
447 2016.
- 448 Bonn, B., and Moorgat, G.: New particle formation during a- and b-pinene oxidation by O<sub>3</sub>, OH and NO<sub>3</sub>, and the influence  
449 of water vapour: particle size distribution studies, *Atmos Chem Phys*, 2, 183-196, 2002.
- 450 Bonn, B., Schuster, G., and Moortgat, G. K.: Influence of water vapor on the process of new particle formation during  
451 monoterpene ozonolysis, *The Journal of Physical Chemistry A*, 106, 2869-2881, 2002.
- 452 Boy, M., and Kulmala, M.: Nucleation events in the continental boundary layer: Influence of physical and meteorological  
453 parameters, *Atmos Chem Phys*, 2, 1-16, 2002.

454 Burkholder, J. B., Baynard, T., Ravishankara, A. R., and Lovejoy, E. R.: Particle nucleation following the O-3 and OH  
455 initiated oxidation of alpha-pinene and beta-pinene between 278 and 320 K, *J Geophys Res-Atmos*, 112,  
456 10.1029/2006jd007783, 2007.

457 Cai, R., Yang, D., Fu, Y., Wang, X., Li, X., Ma, Y., Hao, J., Zheng, J., and Jiang, J.: Aerosol surface area concentration: a  
458 governing factor in new particle formation in Beijing, *Atmos Chem Phys*, 17, 12327, 2017.

459 Chen, H., Ezell, M. J., Arquero, K. D., Varner, M. E., Dawson, M. L., Gerber, R. B., and Finlayson-Pitts, B. J.: New particle  
460 formation and growth from methanesulfonic acid, trimethylamine and water, *Physical Chemistry Chemical Physics*, 17,  
461 13699-13709, 2015.

462 Chen, M., Titcombe, M., Jiang, J., Jen, C., Kuang, C., Fischer, M. L., Eisele, F. L., Siepmann, J. I., Hanson, D. R., and Zhao,  
463 J.: Acid-base chemical reaction model for nucleation rates in the polluted atmospheric boundary layer, *Proceedings of the  
464 National Academy of Sciences*, 109, 18713-18718, 2012.

465 Crouse, J. D., Nielsen, L. B., Jørgensen, S., Kjaergaard, H. G., and Wennberg, P. O.: Autoxidation of organic compounds in  
466 the atmosphere, *The Journal of Physical Chemistry Letters*, 4, 3513-3520, 2013.

467 Crump, J. G., and Seinfeld, J. H.: TURBULENT DEPOSITION AND GRAVITATIONAL SEDIMENTATION OF AN  
468 AEROSOL IN A VESSEL OF ARBITRARY SHAPE, *J Aerosol Sci*, 12, 405-415, 10.1016/0021-8502(81)90036-7, 1981.

469 Dada, L., Paasonen, P., Nieminen, T., Buenrostro Mazon, S., Kontkanen, J., Peräkylä, O., Lehtipalo, K., Hussein, T., Petäjä,  
470 T., and Kerminen, V.-M.: Long-term analysis of clear-sky new particle formation events and nonevents in Hyytiälä, *Atmos  
471 Chem Phys*, 17, 6227-6241, 2017.

472 Donahue, N. M., Trump, E. R., Pierce, J. R., and Riipinen, I.: Theoretical constraints on pure vapor-pressure driven  
473 condensation of organics to ultrafine particles, *Geophys Res Lett*, 38, 10.1029/2011gl048115, 2011.

474 Donahue, N. M., Kroll, J., Pandis, S. N., and Robinson, A. L.: A two-dimensional volatility basis set-Part 2: Diagnostics of  
475 organic-aerosol evolution, *Atmos Chem Phys*, 12, 615-634, 2012.

476 Donahue, N. M., Ortega, I. K., Chuang, W., Riipinen, I., Riccobono, F., Schobesberger, S., Dommen, J., Baltensperger, U.,  
477 Kulmala, M., Worsnop, D. R., and Vehkamäki, H.: How do organic vapors contribute to new-particle formation?, *Faraday  
478 discussions*, 165, 91-104, 10.1039/c3fd00046j, 2013.

479 Dunne, E. M., Gordon, H., Kürten, A., Almeida, J., Duplissy, J., Williamson, C., Ortega, I. K., Pringle, K. J., Adamov, A.,  
480 Baltensperger, U., Barmet, P., Benduhn, F., Bianchi, F., Breitenlechner, M., Clarke, A., Curtius, J., Dommen, J., Donahue, N.  
481 M., Ehrhart, S., Flagan, R. C., Franchin, A., Guida, R., Hakala, J., Hansel, A., Heinritzi, M., Jokinen, T., Kangasluoma, J.,  
482 Kirkby, J., Kulmala, M., Kupc, A., Lawler, M. J., Lehtipalo, K., Makhmutov, V., Mann, G., Mathot, S., Merikanto, J.,  
483 Miettinen, P., Nenes, A., Onnela, A., Rap, A., Reddington, C. L. S., Riccobono, F., Richards, N. A. D., Rissanen, M. P.,  
484 Rondo, L., Sarnela, N., Schobesberger, S., Sengupta, K., Simon, M., Sipila, M., Smith, J. N., Stozkhov, Y., Tome, A., Trostl,  
485 J., Wagner, P. E., Wimmer, D., Winkler, P. M., Worsnop, D. R., and Carslaw, K. S.: Global atmospheric particle formation  
486 from CERN CLOUD measurements, *Science*, 354, 1119-1124, 10.1126/science.aaf2649, 2016.

487 Duplissy, J., Merikanto, J., Franchin, A., Tsagkogeorgas, G., Kangasluoma, J., Wimmer, D., Vuollekoski, H., Schobesberger,  
488 S., Lehtipalo, K., and Flagan, R.: Effect of ions on sulfuric acid - water binary particle formation: 2. Experimental data and  
489 comparison with QC - normalized classical nucleation theory, *Journal of Geophysical Research: Atmospheres*, 121,  
490 1752-1775, 2016.

491 Ehn, M., Kleist, E., Junninen, H., Petäjä, T., Lönn, G., Schobesberger, S., Maso, M. D., Trimborn, A., Kulmala, M., and  
492 Worsnop, D.: Gas phase formation of extremely oxidized pinene reaction products in chamber and ambient air, *Atmos Chem  
493 Phys*, 12, 5113-5127, 2012.

494 Ehn, M., Thornton, J. A., Kleist, E., Sipila, M., Junninen, H., Pullinen, I., Springer, M., Rubach, F., Tillmann, R., Lee, B.,  
495 Lopez-Hilfiker, F., Andres, S., Acir, I.-H., Rissanen, M., Jokinen, T., Schobesberger, S., Kangasluoma, J., Kontkanen, J.,  
496 Nieminen, T., Kurtén, T., Nielsen, L. B., Jørgensen, S., Kjaergaard, H. G., Canagaratna, M., Dal Maso, M., Berndt, T., Petaja,  
497 T., Wahner, A., Kerminen, V.-M., Kulmala, M., Worsnop, D. R., Wildt, J., and Mentel, T. F.: A large source of low-volatility  
498 secondary organic aerosol, *Nature*, 506, 476+, 10.1038/nature13032, 2014.



499 Eisele, F. L., and Tanner, D. J.: Measurement of the gas-phase concentration of H<sub>2</sub>SO<sub>4</sub> and methane sulfonic-acid and  
500 estimates of H<sub>2</sub>SO<sub>4</sub> production and loss in the atmosphere, *J Geophys Res-Atmos*, 98, 9001-9010, 10.1029/93jd00031,  
501 1993.

502 Frege, C., Ortega, I. K., Rissanen, M. P., Praplan, A. P., Steiner, G., Heinritzi, M., Ahonen, L., Amorim, A., Bernhammer,  
503 A.-K., and Bianchi, F.: Influence of temperature on the molecular composition of ions and charged clusters during pure  
504 biogenic nucleation, *Atmos Chem Phys*, 18, 65-79, 2018.

505 Hamed, A., Korhonen, H., Sihto, S. L., Joutsensaari, J., Järvinen, H., Petäjä, T., Arnold, F., Nieminen, T., Kulmala, M., and  
506 Smith, J. N.: The role of relative humidity in continental new particle formation, *Journal of Geophysical Research:*  
507 *Atmospheres*, 116, 2011.

508 Hanson, D., McMurry, P., Jiang, J., Tanner, D., and Huey, L.: Ambient pressure proton transfer mass spectrometry: detection  
509 of amines and ammonia, *Environ Sci Technol*, 45, 8881-8888, 2011.

510 Hoffmann, T., O'Dowd, C. D., and Seinfeld, J. H.: Iodine oxide homogeneous nucleation: An explanation for coastal new  
511 particle production, *Geophys Res Lett*, 28, 1949-1952, 2001.

512 Hyttinen, N., Kupiainen-Määttä, O., Rissanen, M. P., Muuronen, M., Ehn, M., and Kurtén, T.: Modeling the charging of  
513 highly oxidized cyclohexene ozonolysis products using nitrate-based chemical ionization, *The Journal of Physical Chemistry*  
514 *A*, 119, 6339-6345, 2015.

515 Hyvönen, S., Junninen, H., Laakso, L., Maso, M. D., Grönholm, T., Bonn, B., Keronen, P., Aalto, P., Hiltunen, V., and Pohja,  
516 T.: A look at aerosol formation using data mining techniques, *Atmos Chem Phys*, 5, 3345-3356, 2005.

517 Isaacman-VanWertz, G., Massoli, P., O'Brien, R., Lim, C., Franklin, J. P., Moss, J. A., Hunter, J. F., Nowak, J. B.,  
518 Canagaratna, M. R., and Misztal, P. K.: Chemical evolution of atmospheric organic carbon over multiple generations of  
519 oxidation, *Nature chemistry*, 1, 2018.

520 Johnson, D., and Marston, G.: The gas-phase ozonolysis of unsaturated volatile organic compounds in the troposphere,  
521 *Chemical Society Reviews*, 37, 699-716, 2008.

522 Jokinen, T., Sipilä, M., Junninen, H., Ehn, M., Lonn, G., Hakala, J., Petaja, T., Mauldin, R. L., Kulmala, M., and Worsnop, D.  
523 R.: Atmospheric sulphuric acid and neutral cluster measurements using CI-API-TOF, *Atmos Chem Phys*, 12, 4117-4125,  
524 2012.

525 Jokinen, T., Sipilä, M., Richters, S., Kerminen, V. M., Paasonen, P., Stratmann, F., Worsnop, D., Kulmala, M., Ehn, M., and  
526 Herrmann, H.: Rapid autoxidation forms highly oxidized RO<sub>2</sub> radicals in the atmosphere, *Angewandte Chemie International*  
527 *Edition*, 53, 14596-14600, 2014.

528 Jonsson, Å. M., Hallquist, M., and Ljungström, E.: Impact of humidity on the ozone initiated oxidation of limonene,  
529 Δ<sup>3</sup>-carene, and α-pinene, *Environ Sci Technol*, 40, 188-194, 2006.

530 Jonsson, Å. M., Hallquist, M., and Ljungström, E.: Influence of OH scavenger on the water effect on secondary organic  
531 aerosol formation from ozonolysis of limonene, Δ<sup>3</sup>-carene, and α-pinene, *Environ Sci Technol*, 42, 5938-5944, 2008.

532 Junninen, H., Ehn, M., Petaja, T., Luosujarvi, L., Kotiaho, T., Kostianen, R., Rohner, U., Gonin, M., Fuhrer, K., Kulmala,  
533 M., and Worsnop, D. R.: A high-resolution mass spectrometer to measure atmospheric ion composition, *Atmos Meas Tech*, 3,  
534 1039-1053, 2010.

535 Kamens, R., Jang, M., Chien, C.-J., and Leach, K.: Aerosol Formation from the Reaction of α-Pinene and Ozone Using a  
536 Gas-Phase Kinetics-Aerosol Partitioning Model, *Environ Sci Technol*, 33, 1430-1438, 10.1021/es980725r, 1999.

537 Kroll, J. H., Donahue, N. M., Jimenez, J. L., Kessler, S. H., Canagaratna, M. R., Wilson, K. R., Altieri, K. E., Mazzoleni, L.  
538 R., Wozniak, A. S., Bluhm, H., Mysak, E. R., Smith, J. D., Kolb, C. E., and Worsnop, D. R.: Carbon oxidation state as a  
539 metric for describing the chemistry of atmospheric organic aerosol, *Nature Chemistry*, 3, 133-139, 10.1038/nchem.948,  
540 2011.

541 Kuang, C., McMurry, P. H., McCormick, A. V., and Eisele, F. L.: Dependence of nucleation rates on sulfuric acid vapor  
542 concentration in diverse atmospheric locations, *J Geophys Res*, 113, 10.1029/2007jd009253, 2008.

543 Kulmala, M., Dal Maso, M., Makela, J. M., Pirjola, L., Vakeva, M., Aalto, P., Miikkulainen, P., Hameri, K., and O'Dowd, C.

544 D.: On the formation, growth and composition of nucleation mode particles, *Tellus B*, 53, 479-490,  
545 10.1034/j.1600-0889.2001.d01-33.x, 2001.

546 Kulmala, M., Vehkamäki, H., Petäjä, T., Dal Maso, M., Lauri, A., Kerminen, V. M., Birmili, W., and McMurry, P. H.:  
547 Formation and growth rates of ultrafine atmospheric particles: a review of observations, *J Aerosol Sci*, 35, 143-176,  
548 10.1016/j.jaerosci.2003.10.003, 2004.

549 Kulmala, M., Petäjä, T., Ehn, M., Thornton, J., Sipilä, M., Worsnop, D., and Kerminen, V.-M.: Chemistry of atmospheric  
550 nucleation: on the recent advances on precursor characterization and atmospheric cluster composition in connection with  
551 atmospheric new particle formation, *Annual review of physical chemistry*, 65, 21-37, 2014.

552 Kürten, A., Rondo, L., Ehrhart, S., and Curtius, J.: Calibration of a Chemical Ionization Mass Spectrometer for the  
553 Measurement of Gaseous Sulfuric Acid, *J Phys Chem A*, 116, 6375-6386, 2012.

554 Kürten, A., Jokinen, T., Simon, M., Sipilä, M., Sarnela, N., Junninen, H., Adamov, A., Almeida, J., Amorim, A., Bianchi, F.,  
555 Breitenlechner, M., Dommen, J., Donahue, N. M., Duplissy, J., Ehrhart, S., Flagan, R. C., Franchin, A., Hakala, J., Hansel,  
556 A., Heinritzi, M., Hutterli, M., Kangasluoma, J., Kirkby, J., Laaksonen, A., Lehtipalo, K., Leiminger, M., Makhmutov, V.,  
557 Mathot, S., Onnela, A., Petaja, T., Praplan, A. P., Riccobono, F., Rissanen, M. P., Rondo, L., Schobesberger, S., Seinfeld, J.  
558 H., Steiner, G., Tome, A., Troestl, J., Winkler, P. M., Williamson, C., Wimmer, D., Ye, P., Baltensperger, U., Carslaw, K. S.,  
559 Kulmala, M., Worsnop, D. R., and Curtius, J.: Neutral molecular cluster formation of sulfuric acid-dimethylamine observed  
560 in real time under atmospheric conditions, *P Natl Acad Sci USA*, 111, 15019-15024, 10.1073/pnas.1404853111, 2014.

561 Kürten, A., Bergen, A., Heinritzi, M., Leiminger, M., Lorenz, V., Piel, F., Simon, M., Sitals, R., Wagner, A. C., and Curtius, J.:  
562 Observation of new particle formation and measurement of sulfuric acid, ammonia, amines and highly oxidized organic  
563 molecules at a rural site in central Germany, *Atmos Chem Phys*, 16, 12793-12813, 10.5194/acp-16-12793-2016, 2016.

564 Kurten, T., Rissanen, M. P., Mackeprang, K., Thornton, J. A., Hyttinen, N., Jorgensen, S., Ehn, M., and Kjaergaard, H. G.:  
565 Computational Study of Hydrogen Shifts and Ring-Opening Mechanisms in alpha-Pinene Ozonolysis Products, *J Phys Chem*  
566 *A*, 119, 11366-11375, 10.1021/acs.jpca.5b08948, 2015.

567 Kurtén, T., Tiusanen, K., Roldin, P., Rissanen, M., Luy, J.-N., Boy, M., Ehn, M., and Donahue, N.:  $\alpha$ -Pinene Autoxidation  
568 Products May Not Have Extremely Low Saturation Vapor Pressures Despite High O:C Ratios, *The Journal of Physical*  
569 *Chemistry A*, 120, 2569-2582, 10.1021/acs.jpca.6b02196, 2016.

570 Lee, B. H., Lopez-Hilfiker, F. D., Mohr, C., Kurtén, T., Worsnop, D. R., and Thornton, J. A.: An iodide-adduct  
571 high-resolution time-of-flight chemical-ionization mass spectrometer: Application to atmospheric inorganic and organic  
572 compounds, *Environ Sci Technol*, 48, 6309-6317, 2014.

573 Li, Y., Poeschl, U., and Shiraiwa, M.: Molecular corridors and parameterizations of volatility in the chemical evolution of  
574 organic aerosols, *Atmos Chem Phys*, 16, 3327-3344, 10.5194/acp-16-3327-2016, 2016.

575 Makkonen, R., Asmi, A., Kerminen, V. M., Boy, M., Arneth, A., Hari, P., and Kulmala, M.: Air pollution control and  
576 decreasing new particle formation lead to strong climate warming, *Atmos Chem Phys*, 12, 1515-1524,  
577 10.5194/acp-12-1515-2012, 2012.

578 McVay, R. C., Zhang, X., Aumont, B., Valorso, R., Camredon, M., La, Y. S., Wennberg, P. O., and Seinfeld, J. H.: SOA  
579 formation from the photooxidation of  $\alpha$ -pinene: systematic exploration of the simulation of chamber data, *Atmos Chem Phys*,  
580 16, 2785-2802, 2016.

581 Merikanto, J., Spracklen, D., Mann, G., Pickering, S., and Carslaw, K.: Impact of nucleation on global CCN, *Atmos Chem*  
582 *Phys*, 9, 8601-8616, 2009.

583 Merikanto, J., Duplissy, J., Määttänen, A., Henschel, H., Donahue, N. M., Brus, D., Schobesberger, S., Kulmala, M., and  
584 Vehkamäki, H.: Effect of ions on sulfuric acid - water binary particle formation: 1. Theory for kinetic - and nucleation -  
585 type particle formation and atmospheric implications, *Journal of Geophysical Research: Atmospheres*, 121, 1736-1751,  
586 2016.

587 Metzger, A., Verheggen, B., Dommen, J., Duplissy, J., Prevot, A. S., Weingartner, E., Riipinen, I., Kulmala, M., Spracklen, D.  
588 V., Carslaw, K. S., and Baltensperger, U.: Evidence for the role of organics in aerosol particle formation under atmospheric

589 conditions, *Proc Natl Acad Sci U S A*, 107, 6646-6651, 10.1073/pnas.0911330107, 2010.

590 Molteni, U., Bianchi, F., Klein, F., Haddad, I. E., Frege, C., Rossi, M. J., Dommen, J., and Baltensperger, U.: Formation of  
591 highly oxygenated organic molecules from aromatic compounds, *Atmos Chem Phys*, 18, 1909-1921, 2018.

592 Napari, I., Noppel, M., Vehkamäki, H., and Kulmala, M.: Parametrization of ternary nucleation rates for H<sub>2</sub>SO<sub>4</sub> - NH<sub>3</sub> -  
593 H<sub>2</sub>O vapors, *Journal of Geophysical Research: Atmospheres*, 107, 2002.

594 O'Dowd, C. D., Geever, M., Hill, M. K., Smith, M. H., and Jennings, S. G.: New particle formation: Nucleation rates and  
595 spatial scales in the clean marine coastal environment, *Geophys Res Lett*, 25, 1661-1664, 1998.

596 Ortega, I. K., Donahue, N. M., Kurtén, T., Kulmala, M., Focsa, C., and Vehkamäki, H.: Can Highly Oxidized Organics  
597 Contribute to Atmospheric New Particle Formation?, *J Phys Chem A*, 120, 1452-1458, 10.1021/acs.jpca.5b07427, 2016.

598 Pankow, J. F., and Asher, W. E.: SIMPOL. 1: a simple group contribution method for predicting vapor pressures and  
599 enthalpies of vaporization of multifunctional organic compounds, *Atmos Chem Phys*, 8, 2773-2796, 2008.

600 Poschl, U., Martin, S. T., Sinha, B., Chen, Q., Gunthe, S. S., Huffman, J. A., Borrmann, S., Farmer, D. K., Garland, R. M.,  
601 Helas, G., Jimenez, J. L., King, S. M., Manzi, A., Mikhailov, E., Pauliquevis, T., Petters, M. D., Prenni, A. J., Roldin, P.,  
602 Rose, D., Schneider, J., Su, H., Zorn, S. R., Artaxo, P., and Andreae, M. O.: Rainforest Aerosols as Biogenic Nuclei of  
603 Clouds and Precipitation in the Amazon, *Science*, 329, 1513-1516, 2010.

604 Rissanen, M. P., Kurtén, T., Sipilä, M., Thornton, J. A., Kausiala, O., Garmash, O., Kjaergaard, H. G., Petäjä, T., Worsnop, D.  
605 R., and Ehn, M.: Effects of chemical complexity on the autoxidation mechanisms of endocyclic alkene ozonolysis products:  
606 From methylcyclohexenes toward understanding  $\alpha$ -pinene, *The Journal of Physical Chemistry A*, 119, 4633-4650, 2015.

607 Schobesberger, S., Junninen, H., Bianchi, F., Lonn, G., Ehn, M., Lehtipalo, K., Dommen, J., Ehrhart, S., Ortega, I. K.,  
608 Franchin, A., Nieminen, T., Riccobono, F., Hutterli, M., Duplissy, J., Almeida, J., Amorim, A., Breitenlechner, M., Downard,  
609 A. J., Dunne, E. M., Flagan, R. C., Kajos, M., Keskinen, H., Kirkby, J., Kupc, A., Kürten, A., Kurtén, T., Laaksonen, A.,  
610 Mathot, S., Onnela, A., Praplan, A. P., Rondo, L., Santos, F. D., Schallhart, S., Schnitzhofer, R., Sipilä, M., Tome, A.,  
611 Tsagkogeorgas, G., Vehkamäki, H., Wimmer, D., Baltensperger, U., Carslaw, K. S., Curtius, J., Hansel, A., Petaja, T.,  
612 Kulmala, M., Donahue, N. M., and Worsnop, D. R.: Molecular understanding of atmospheric particle formation from sulfuric  
613 acid and large oxidized organic molecules, *Proc Natl Acad Sci U S A*, 110, 17223-17228, 10.1073/pnas.1306973110, 2013.

614 Shen, X. J., Sun, J. Y., Zhang, Y. M., Wehner, B., Nowak, A., Tuch, T., Zhang, X. C., Wang, T. T., Zhou, H. G., Zhang, X. L.,  
615 Dong, F., Birmili, W., and Wiedensohler, A.: First long-term study of particle number size distributions and new particle  
616 formation events of regional aerosol in the North China Plain, *Atmos Chem Phys*, 11, 1565-1580, 10.5194/acp-11-1565-2011,  
617 2011.

618 Sihto, S.-L., Kulmala, M., Kerminen, V.-M., Maso, M. D., Petäjä, T., Riipinen, I., Korhonen, H., Arnold, F., Janson, R., and  
619 Boy, M.: Atmospheric sulphuric acid and aerosol formation: implications from atmospheric measurements for nucleation and  
620 early growth mechanisms, *Atmos Chem Phys*, 6, 4079-4091, 2006.

621 Thomson, B., and Iribarne, J.: Field induced ion evaporation from liquid surfaces at atmospheric pressure, *The Journal of*  
622 *Chemical Physics*, 71, 4451-4463, 1979.

623 Tobias, H. J., Docherty, K. S., Beving, D. E., and Ziemann, P. J.: Effect of relative humidity on the chemical composition of  
624 secondary organic aerosol formed from reactions of 1-tetradecene and O<sub>3</sub>, *Environ Sci Technol*, 34, 2116-2125, 2000.

625 Tobias, H. J., and Ziemann, P. J.: Kinetics of the gas-phase reactions of alcohols, aldehydes, carboxylic acids, and water with  
626 the C<sub>13</sub> stabilized Criegee intermediate formed from ozonolysis of 1-tetradecene, *The Journal of Physical Chemistry A*, 105,  
627 6129-6135, 2001.

628 Tröstl, J., Chuang, W. K., Gordon, H., Heinritzi, M., Yan, C., Molteni, U., Ahlm, L., Frege, C., Bianchi, F., and Wagner, R.:  
629 The role of low-volatility organic compounds in initial particle growth in the atmosphere, *Nature*, 533, 527-531, 2016.

630 Vehkamäki, H., and Riipinen, I.: Thermodynamics and kinetics of atmospheric aerosol particle formation and growth,  
631 *Chemical Society Reviews*, 41, 5160-5173, 2012.

632 Weber, R., Marti, J., McMurry, P., Eisele, F., Tanner, D., and Jefferson, A.: Measurements of new particle formation and  
633 ultrafine particle growth rates at a clean continental site, *Journal of Geophysical Research: Atmospheres*, 102, 4375-4385,

634 1997.

635 Weber, R., McMurry, P. H., Mauldin, R., Tanner, D., Eisele, F., Clarke, A., and Kapustin, V.: New particle formation in the  
636 remote troposphere: A comparison of observations at various sites, *Geophys Res Lett*, 26, 307-310, 1999.

637 Yu, H., McGraw, R., and Lee, S.-H.: Effects of amines on formation of sub-3 nm particles and their subsequent growth,  
638 *Geophys Res Lett*, 39, 10.1029/2011gl050099, 2012.

639 Zhang, R., Khalizov, A., Wang, L., Hu, M., and Xu, W.: Nucleation and growth of nanoparticles in the atmosphere, *Chem*  
640 *Rev*, 112, 1957-2011, 10.1021/cr2001756, 2012.

641 Zhang, X., McVay, R. C., Huang, D. D., Dalleska, N. F., Aumont, B., Flagan, R. C., and Seinfeld, J. H.: Formation and  
642 evolution of molecular products in  $\alpha$ -pinene secondary organic aerosol, *Proceedings of the National Academy of Sciences*,  
643 112, 14168-14173, 2015.

644 Zhao, J., Khalizov, A., Zhang, R., and McGraw, R.: Hydrogen-bonding interaction in molecular complexes and clusters of  
645 aerosol nucleation precursors, *The Journal of Physical Chemistry A*, 113, 680-689, 2009.

646 Zhao, J., Eisele, F. L., Titcombe, M., Kuang, C., and McMurry, P. H.: Chemical ionization mass spectrometric measurements  
647 of atmospheric neutral clusters using the cluster - CIMS, *Journal of Geophysical Research: Atmospheres*, 115, 2010.

648 Zhao, J., Ortega, J., Chen, M., and McMurry, P. H.: Dependence of particle nucleation and growth on high molecular weight  
649 gas phase products during ozonolysis of  $\alpha$ -pinene, *Atmospheric Chemistry & Physics*, 13, 7631-7644, 2013.

650

651 **Table 1. Experiment conditions and products.**

| Precursor              | Exp (#) | Monoterpene (ppbv) | O <sub>3</sub> (ppbv) | Cyclo-hexane (ppmv) | Initial rate <sup>1</sup> (10 <sup>8</sup> molecules cm <sup>-3</sup> s <sup>-1</sup> ) | O <sub>3</sub> consumption <sup>2</sup> (ppb) | SOA <sup>3</sup> (μg m <sup>-3</sup> ) |
|------------------------|---------|--------------------|-----------------------|---------------------|-----------------------------------------------------------------------------------------|-----------------------------------------------|----------------------------------------|
| Limonene               | 1       | 1085               | 900±10                | 0                   | 1410                                                                                    | 159-166                                       | 138-208                                |
|                        | 2       | 1085               | 900±10                | 217                 | 1410                                                                                    | 139-150                                       | 81-147                                 |
|                        | 3       | 54                 | 350±5                 | 0                   | 27.3                                                                                    | 34-41                                         | 0                                      |
| α-pinene               | 4       | 1111               | 900±10                | 0                   | 625                                                                                     | 103-110                                       | 761-1042                               |
|                        | 5       | 1111               | 900±10                | 222                 | 625                                                                                     | 93-102                                        | 414-735                                |
|                        | 6       | 54                 | 350±5                 | 0                   | 11.8                                                                                    | 23-30                                         | 0                                      |
| Δ <sup>3</sup> -carene | 7       | 1111               | 900±10                | 0                   | 267                                                                                     | 72-89                                         | 55-93                                  |
|                        | 8       | 1111               | 900±10                | 222                 | 267                                                                                     | 70-86                                         | 34-92                                  |
|                        | 9       | 54                 | 350±5                 | 0                   | 5.05                                                                                    | 11-16                                         | 0                                      |

652 <sup>1</sup>At room temperature (298K), the rate coefficients for limonene, α-pinene and Δ<sup>3</sup>-carene to react with O<sub>3</sub> were 200×10<sup>-18</sup>,  
653 86.6×10<sup>-18</sup>, 37×10<sup>-18</sup> cm<sup>3</sup> molecule<sup>-1</sup> s<sup>-1</sup>, respectively.

654 <sup>2</sup>O<sub>3</sub> consumption values were calculated from the difference between inlet and outlet O<sub>3</sub> concentrations.

655 <sup>3</sup>SOA mass concentrations were calculated from SMPS-measured volume concentrations and an assumed organic effective density  
656 (1.2 g cm<sup>-3</sup>).

657

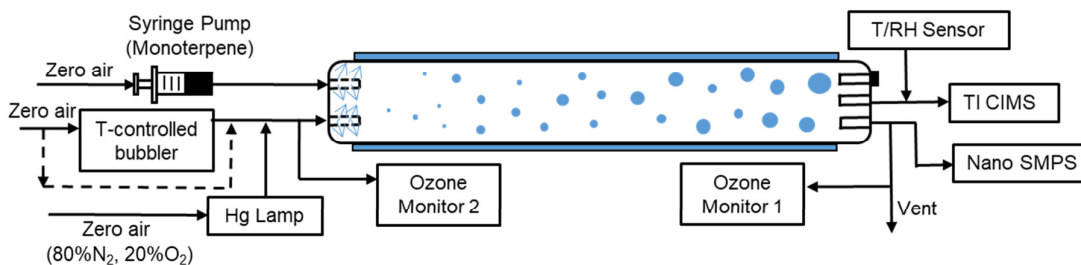

658  
 659 **Figure 1. Experiment setup for the flow tube experiments. The 8.5 L flow tube was placed at a temperature-controlled room**  
 660 **( $21 \pm 1^\circ\text{C}$ ) and covered. The total flowrate was 8.5 LPM. The RH was adjusted by mixing temperature controlled bubbler flow with**  
 661 **dry zero air.**

662

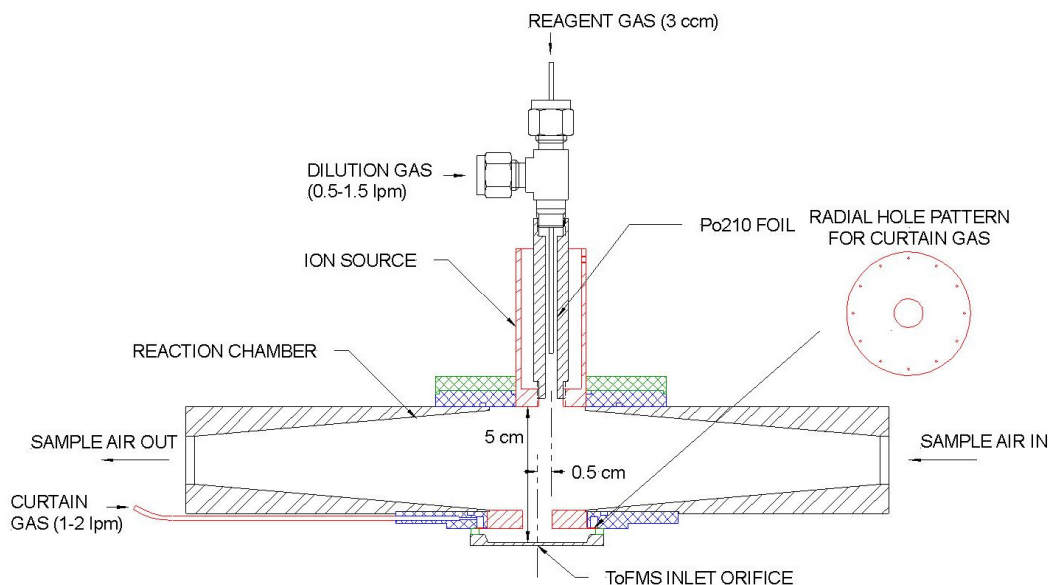

663  
 664 **Figure 2. Schematic of the transverse ionization (TI) inlet, showing the  $\text{N}_2$  curtain gas configuration. The relative position of the**  
 665 **ion source to the inlet orifice is adjustable. The configuration shown here is the most sensitive in calibrations with  $\text{H}_2\text{SO}_4$  (see**  
 666 **Section 3.1).**

667

668

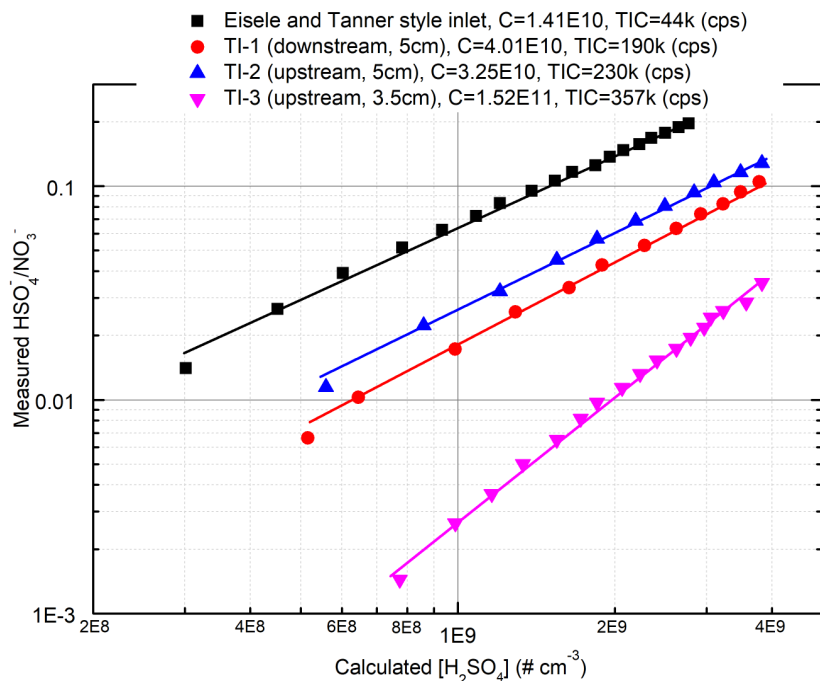

669  
 670 **Figure 3.** Comparison of the sensitivities for the two inlets to  $\text{H}_2\text{SO}_4$ . The calibration process followed that reported by Kürten et al.  
 671 (2012) and is discussed in detail in the supplementary material. TI-1, 2, 3 represent different locations of the ion source relative to  
 672 the inlet orifice of the mass spectrometer. “upstream” and “downstream” indicated 0.5 cm upstream or downstream along the  
 673 sample flow axis and “3.5 cm” and “5 cm” indicate 3.5 or 5 cm away from the inlet orifice along the reagent ion flow axis.  
 674

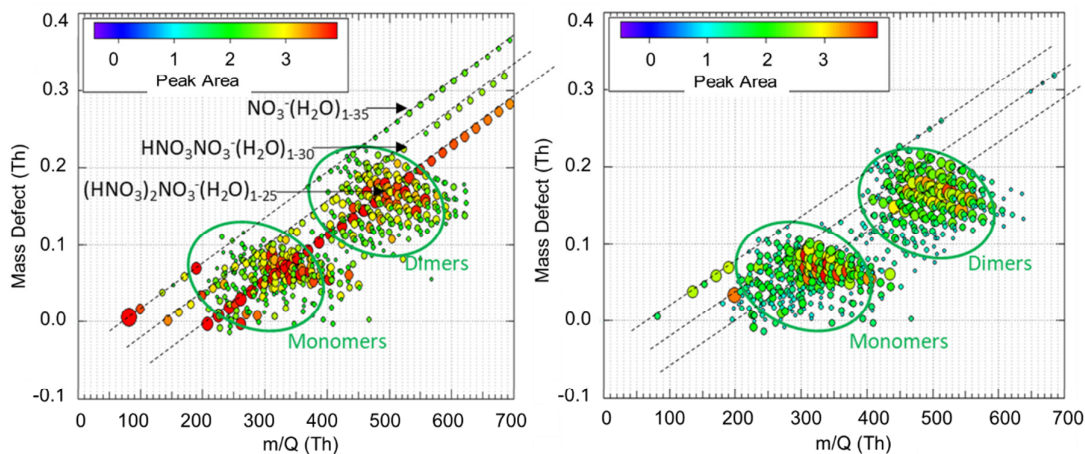

675  
 676 **Figure 4.** Mass defect plots of  $\alpha$ -pinene ozonolysis HOMs with 0 LPM (left) and 1 LPM (right)  $\text{N}_2$  curtain gas flow when  $\text{RH} \approx 85\%$ ,  
 677 with monomer and dimer HOMs circled in green. The most intense ions comprising 60% of the total ion count are plotted for  
 678 clarity.  $\text{H}_2\text{O}$  clusters  $(\text{H}_2\text{O})_m(\text{HNO}_3)_n\text{NO}_3^-$  ( $m = 1 - 35$ ,  $n = 0 - 2$ ) are circled in red in the left plot and are notably absent with the  
 679 application of the  $\text{N}_2$  curtain gas.  $(\text{HNO}_3)_2\text{NO}_3^-$  and  $\text{HNO}_3\text{NO}_3^-$  are much more likely to cluster with  $\text{H}_2\text{O}$  than  $\text{NO}_3^-$ .  
 680

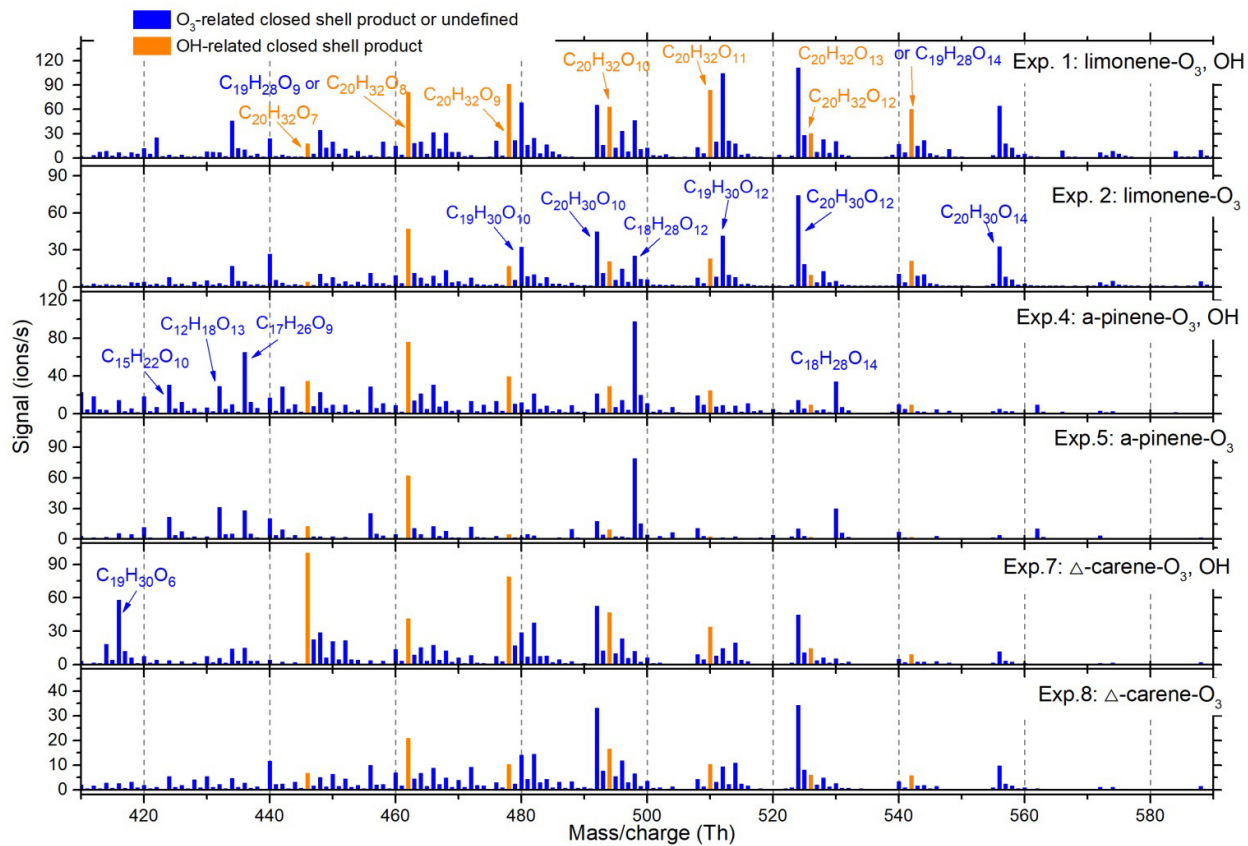

681  
 682 **Figure 5.** Average dimer mass spectrum in each of the particle generation experiments. The OH- and O<sub>3</sub>-derived species were  
 683 distinguished by comparing relative abundance of experiments with and without OH scavenger. All the peaks shown were in the  
 684 form of adducts with NO<sub>3</sub><sup>-</sup> or HNO<sub>3</sub>NO<sub>3</sub><sup>-</sup> reagent ions.

685  
 686



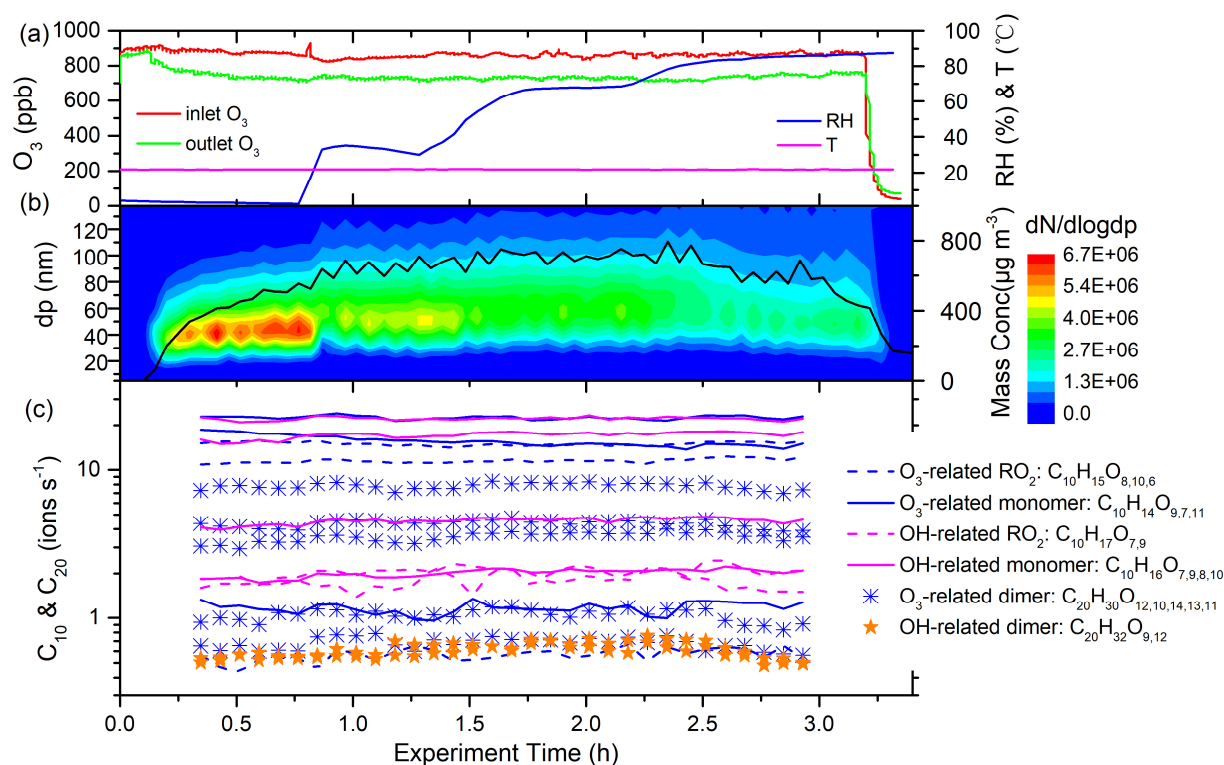

687  
 688 **Figure 6.** Time series of experimental parameters, particle size distribution, and key ions during EXP. 2 (limonene oxidized by  $O_3$   
 689 without OH scavenger). (a) inlet and outlet  $O_3$  concentrations, temperature, and RH; (b) Particle size distribution and integrated  
 690 mass concentrations (assuming effective density is  $1.2 g cm^{-3}$ ); (c) Some of the main HOMs detected by TI-CIMS with  $NO_3^-$  reagent  
 691 ion. The subscript oxygen numbers in the formulae were ranked (left-to-right) according to signal abundance of the corresponding  
 692 molecule.

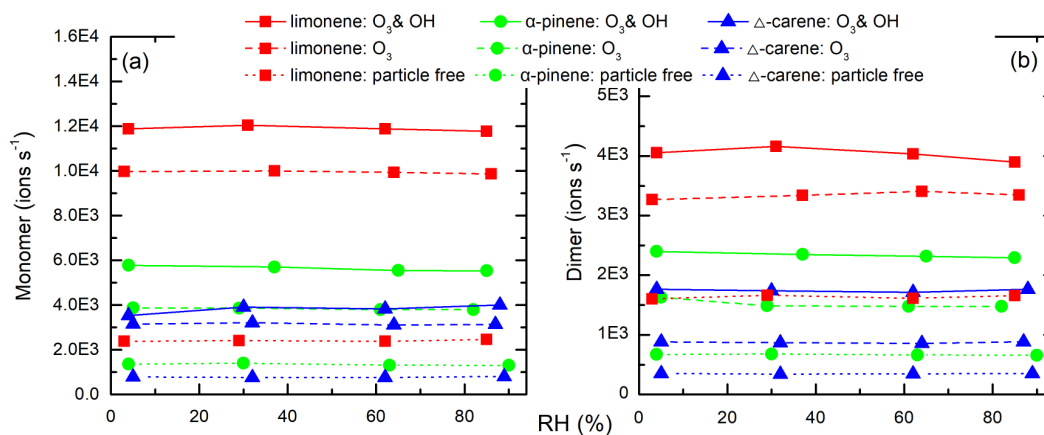

694  
 695 **Figure 7.** Average (a) monomer and (b) dimer HOMs signal intensity ( $ions s^{-1}$ ) as a function of RH in each experiment. Monomer  
 696 signals were the sum of  $C_{5-10}$  molecules and dimer signals were the sum of  $C_{15-20}$  molecules. No obvious signal change was seen for  
 697 increasing RH in any of the experiments.

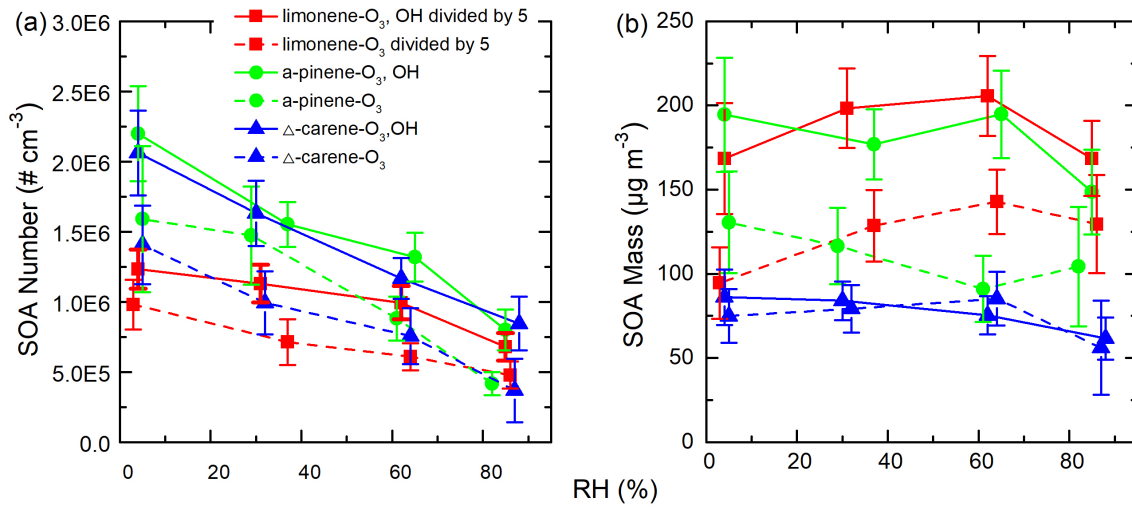

699  
 700 **Figure 8. SOA (a) number and (b) mass concentrations as a function of RH during different experiments. The error bars were**  
 701 **calculated using both the statistical errors of all individual size distributions during each RH stage and assuming a systematic CPC**  
 702 **counting error of 10%).**  
 703

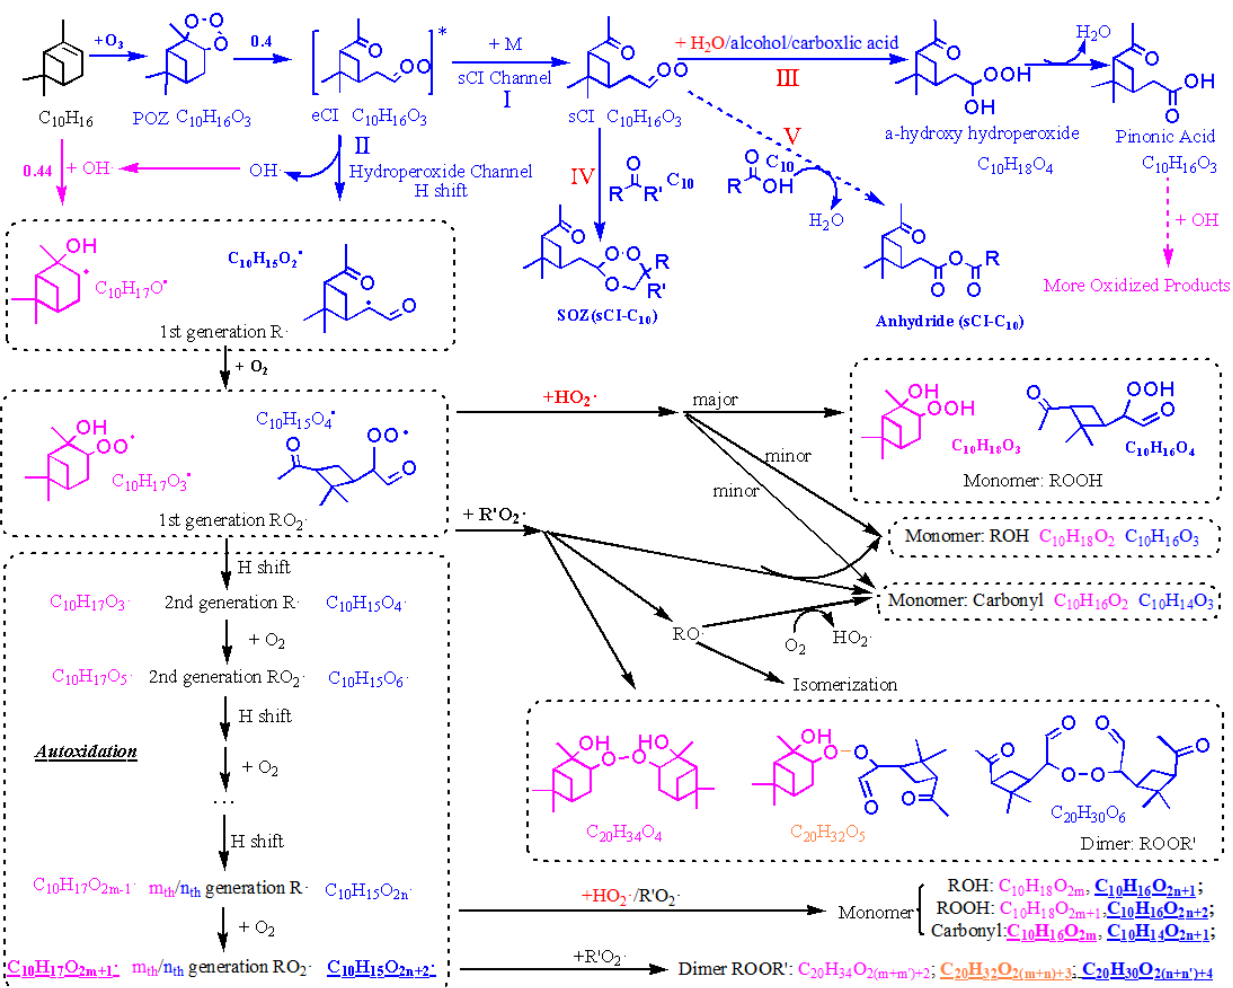

705

706 **Figure 9. Proposed key steps in the formation of the representative  $C_{10}$  and  $C_{20}$  closed shell products from  $\alpha$ -pinene oxidation and**  
 707 **possible water vapor influence. Dashed lines represent pathways that may or may not happen, depending on the situation. Pink**  
 708 **and blue colors represented the pathways or products from  $O_3$  and  $OH$  oxidation, respectively. Common pathways or products are**  
 709 **indicated in black type. Orange colors represented the combined products of  $O_3$  and  $OH$  chemistry. Red colors highlight the direct**  
 710 **or indirect influence of water. Underlined formulae were the main products observed from the mass spectrum.  $C_{10}H_{18}O_{2m}$  and**  
 711  **$C_{20}H_{34}O_{2(m+m')}$  were not observed in our spectrum, but they dominated the spectrum in other reported experiments where extra**  
 712  **$OH$  was generated (Berndt et al., 2016).**

713

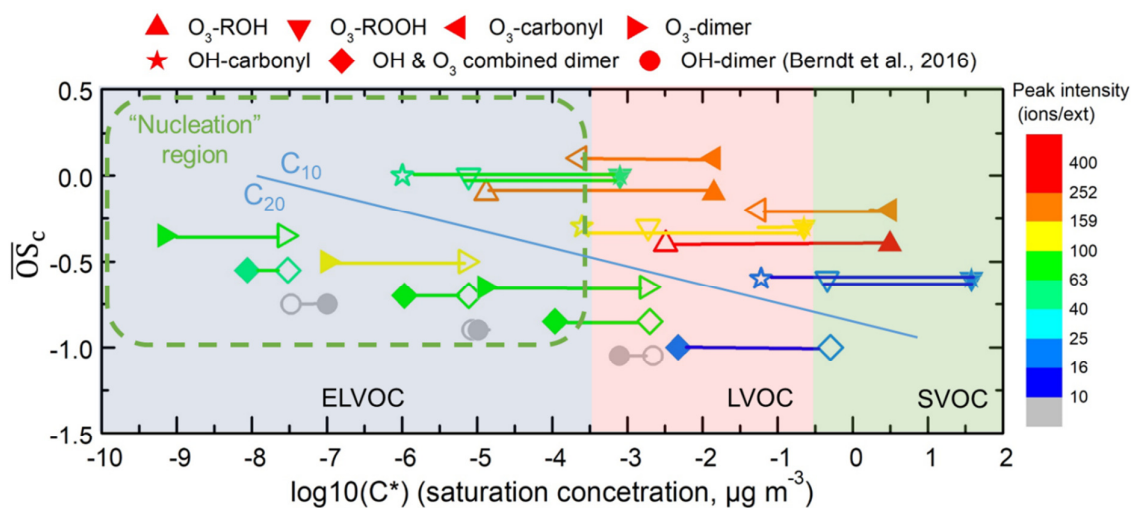

715  
 716 **Figure 10.** Vapor saturation mass concentration  $C^*$  ( $T=298$  K) of the major  $C_{10}$  and  $C_{20}$  closed shell products were predicted with  
 717 SIMPOL.1 (open points) (Pankow and Asher, 2008) and Molecular Corridor method (filled points) (Li et al., 2016). **Lines**  
 718 **connecting the open points and filled points represent the difference between the two methods.**  $O_3$  or OH-derived, monomers and  
 719 dimers are presented in different shapes. The peak intensity, represented by color, is from Exp.1 (limonene oxidation without OH  
 720 scavenger). The gray points, which represent OH-derived dimers, are dominating products in OH initiated oxidation experiments  
 721 (Berndt et al., 2016) while not observed in this study. Data used in this figure are given in Table S1. The nucleation region (green  
 722 dashed rectangle) is from Donahue et al. (2013).

## Supplemental Information: Relative Humidity Effect on the Formation of Highly Oxidized Molecules and New Particles during Monoterpene Oxidation

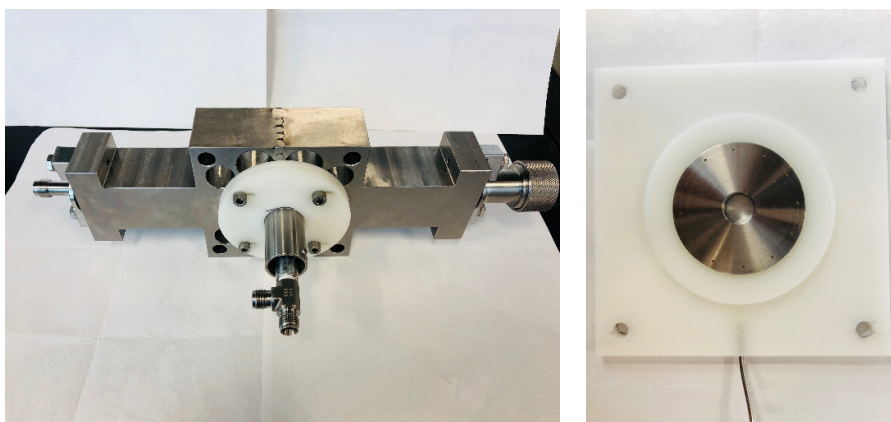

**Figure S1.** Photographs of the Transverse Ionization inlet (left) and the N<sub>2</sub> curtain gas plate (right).

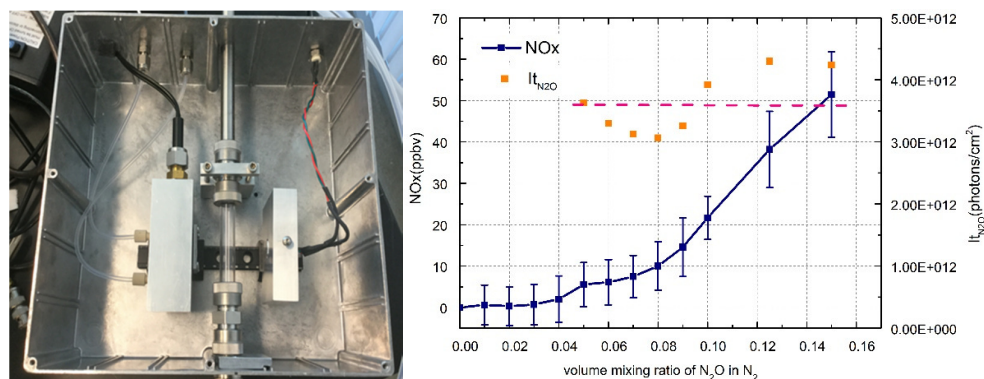

**Figure S2.** (Left) H<sub>2</sub>SO<sub>4</sub> calibration system based on the design of Kurten et al. (Kurten et al., 2012). H<sub>2</sub>SO<sub>4</sub> is generated by exposing known concentrations of gaseous SO<sub>2</sub>, O<sub>2</sub>, and H<sub>2</sub>O to 185nm UV radiation produced by a mercury lamp (model 90-0012-01, Pen Ray) and a 185 nm bandpass filter (model XB32, 185BP20, Omega). Varying [H<sub>2</sub>SO<sub>4</sub>] was achieved under conditions of constant [SO<sub>2</sub>] by varying [OH] in the system. OH is generated from the photolysis of water vapor. The water vapor concentration is calculated from the measured relative humidity (RH) and temperature. The [OH] in the system depends on both [H<sub>2</sub>O] and the light strength, represented by  $It$  (amount of photons per cm<sup>2</sup>), which is the product of the photon intensity  $I$  (amount of photons per second per cm<sup>2</sup>) and the illumination time  $t_r$  (s). (Right) Calibration of photodiode from the N<sub>2</sub>O experiment.  $It$  was determined through chemical actinometry (N<sub>2</sub>O to NO<sub>x</sub> conversion). The light strength was kept constant between photodiode calibration and H<sub>2</sub>SO<sub>4</sub> calibration experiments, this was assured by measurements from a photodiode (model R5764, Hamamatsu) followed by an electrometer (model 485, Keithley).  $It_{N_2O}$  was determined to be  $3.85 \times 10^{12}$  photons cm<sup>-2</sup> when the photodiode current was 62nA. In the H<sub>2</sub>SO<sub>4</sub> calibration experiment, all generated OH was transformed to H<sub>2</sub>SO<sub>4</sub> within several milliseconds, 10% of [H<sub>2</sub>SO<sub>4</sub>] diffusion loss was applied to the 15 cm connection tube between the illumination area and the LTOF inlet. The generated [H<sub>2</sub>SO<sub>4</sub>] was constrained to above  $\sim 3 \times 10^8$  cm<sup>-3</sup> because of the low detection limit of the RH sensor and the incomplete conversion of SO<sub>3</sub> to H<sub>2</sub>SO<sub>4</sub> under low [OH]. (Kurten et al., 2012).

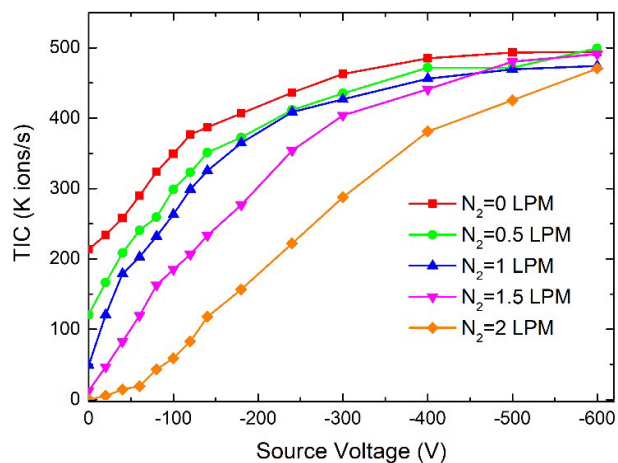

**Figure S3.** Total ion counts from the TI-CIMS as a function of ion source voltage at different curtain gas flow rates. As the ion source voltage increased, the voltage applied to the reaction chamber changed accordingly and always kept at half of the ion source voltage. A 1 LPM curtain gas flow rate and a -100V source voltage were used in our experiments.

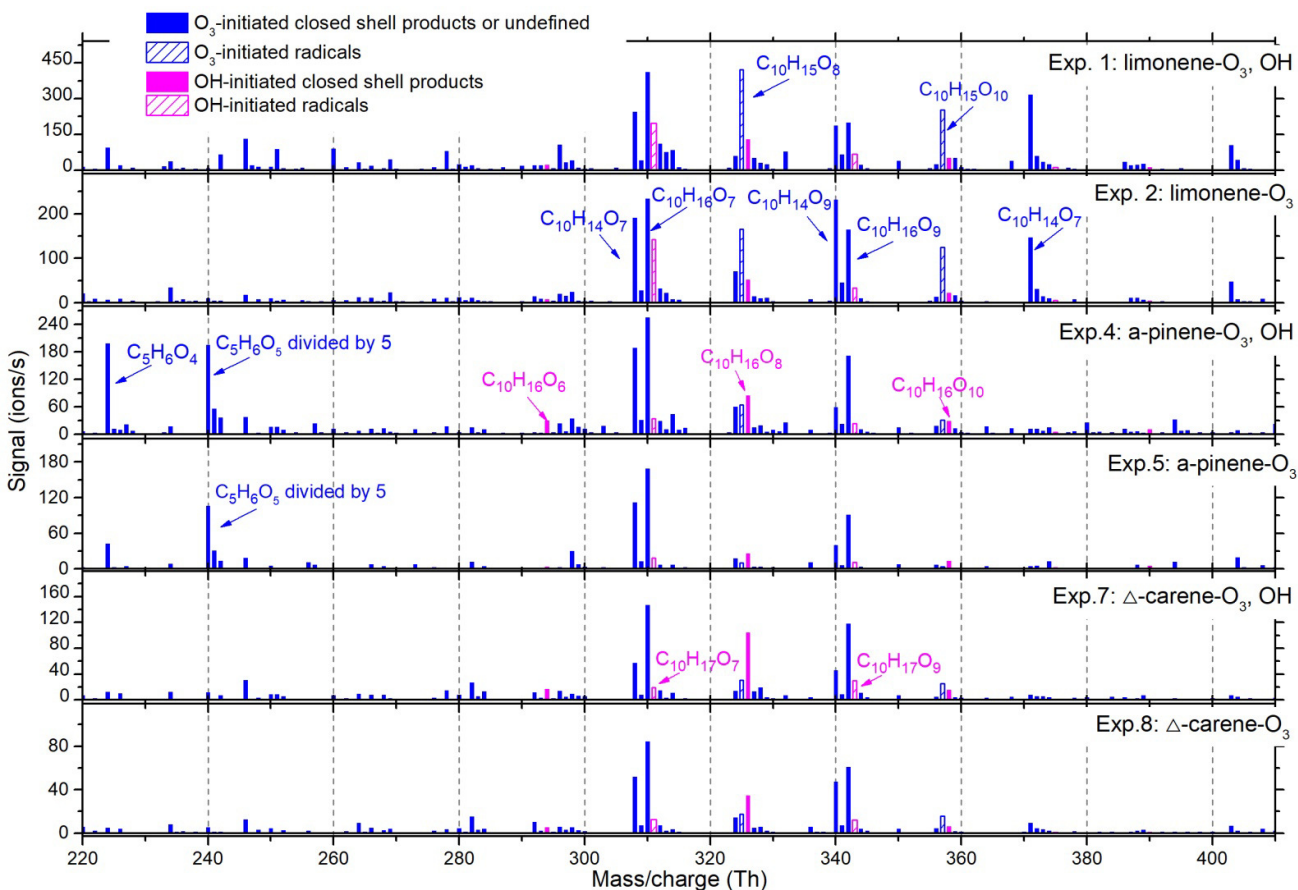

**Figure S4.** Averaged monomer and RO<sub>2</sub> radical mass spectra in six of the particle generation experiments. OH- and O<sub>3</sub>-derived species were identified from previous studies (Jokinen et al., 2014). No significant differences were seen between experiments with and without OH scavengers. Peak labels are the identified neutral molecule, but the mass spectra show these compounds clustered with NO<sub>3</sub><sup>-</sup> or HNO<sub>3</sub>NO<sub>3</sub><sup>-</sup> reagent ions.

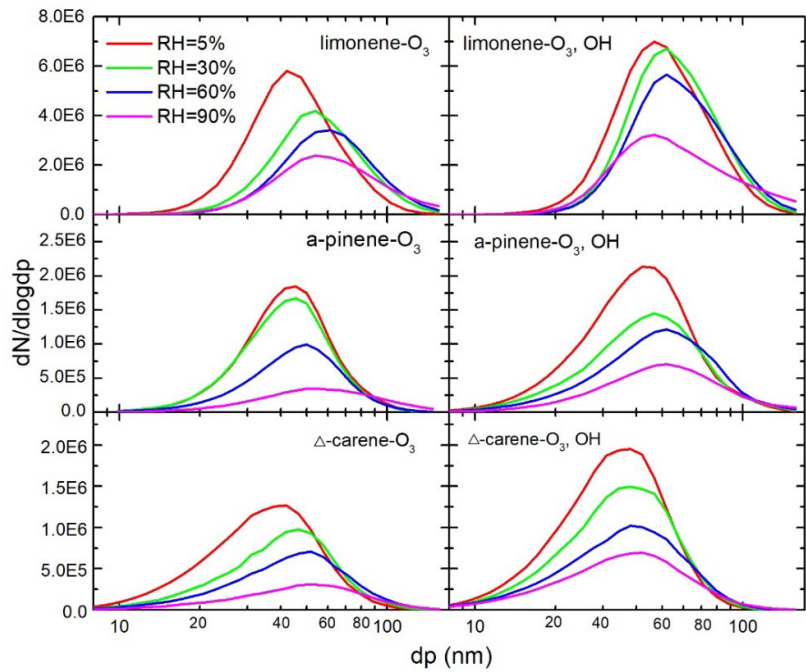

**Figure S5.** Averaged size distributions as a function of RH in each experiment.

**Table S1.** The Volatility of the major products were predicted with SIMPOL.1 (Pankow and Asher, 2008) and Molecular Corridor (298K) methods (Li et al., 2016).

|                          | molecular                                       | $\overline{OS}_c$ | non-aromatic<br>ring <sup>1</sup> , b <sub>4</sub> | -OH,<br>b <sub>7</sub> | -CH=O,<br>b <sub>8</sub> | -C=O-,<br>b <sub>9</sub> | -O-O-,<br>b <sub>26</sub> | -OOH,<br>b <sub>27</sub> | SIMPOL<br>lgC* <sup>2</sup> | M-corridor<br>lgC* | Peak<br>area |
|--------------------------|-------------------------------------------------|-------------------|----------------------------------------------------|------------------------|--------------------------|--------------------------|---------------------------|--------------------------|-----------------------------|--------------------|--------------|
| O <sub>3</sub> -ROH      | C <sub>10</sub> H <sub>16</sub> O <sub>7</sub>  | -0.4              | 1                                                  | 1                      | 1                        | 1                        | 0                         | 2                        | -2.49                       | 0.5                | 412          |
|                          | C <sub>10</sub> H <sub>16</sub> O <sub>9</sub>  | -0.1              | 1                                                  | 1                      | 1                        | 1                        | 0                         | 3                        | -4.88                       | -1.85              | 199          |
| O <sub>3</sub> -ROOH     | C <sub>10</sub> H <sub>16</sub> O <sub>6</sub>  | -0.6              | 1                                                  | 0                      | 1                        | 1                        | 0                         | 2                        | -0.34                       | 1.58               | 22           |
|                          | C <sub>10</sub> H <sub>16</sub> O <sub>8</sub>  | -0.3              | 1                                                  | 0                      | 1                        | 1                        | 0                         | 3                        | -2.72                       | -0.65              | 129          |
|                          | C <sub>10</sub> H <sub>16</sub> O <sub>10</sub> | 0                 | 1                                                  | 0                      | 1                        | 1                        | 0                         | 4                        | -5.11                       | -3.10              | 51           |
| O <sub>3</sub> -carbonyl | C <sub>10</sub> H <sub>14</sub> O <sub>7</sub>  | -0.2              | 1                                                  | 0                      | 1                        | 2                        | 0                         | 2                        | -1.25                       | 0.50               | 245          |
|                          | C <sub>10</sub> H <sub>14</sub> O <sub>9</sub>  | 0.1               | 1                                                  | 0                      | 1                        | 2                        | 0                         | 3                        | -3.64                       | -1.85              | 187          |
| O <sub>3</sub> -dimer    | C <sub>20</sub> H <sub>30</sub> O <sub>10</sub> | -0.65             | 2                                                  | 0                      | 2                        | 2                        | 1                         | 2                        | -2.74                       | -4.98              | 65           |
|                          | C <sub>20</sub> H <sub>30</sub> O <sub>12</sub> | -0.5              | 2                                                  | 0                      | 2                        | 2                        | 1                         | 3                        | -5.15                       | -7.00              | 111          |
|                          | C <sub>20</sub> H <sub>30</sub> O <sub>14</sub> | -0.35             | 2                                                  | 0                      | 2                        | 2                        | 1                         | 4                        | -7.56                       | -9.16              | 64           |
| OH-carbonyl              | C <sub>10</sub> H <sub>16</sub> O <sub>6</sub>  | -0.6              | 2                                                  | 1                      | 0                        | 1                        | 0                         | 2                        | -1.22                       | 1.58               | 22           |
|                          | C <sub>10</sub> H <sub>16</sub> O <sub>8</sub>  | -0.3              | 2                                                  | 1                      | 0                        | 1                        | 0                         | 3                        | -3.60                       | -0.65              | 129          |
|                          | C <sub>10</sub> H <sub>16</sub> O <sub>10</sub> | 0                 | 2                                                  | 1                      | 0                        | 1                        | 0                         | 4                        | -5.99                       | -3.1               | 51           |
| OH&O <sub>3</sub> -dimer | C <sub>20</sub> H <sub>32</sub> O <sub>7</sub>  | -1                | 3                                                  | 1                      | 1                        | 1                        | 1                         | 1                        | -0.29                       | -2.32              | 18           |
|                          | C <sub>20</sub> H <sub>32</sub> O <sub>9</sub>  | -0.85             | 3                                                  | 1                      | 1                        | 1                        | 1                         | 2                        | -2.70                       | -4.04              | 91           |
|                          | C <sub>20</sub> H <sub>32</sub> O <sub>11</sub> | -0.7              | 3                                                  | 1                      | 1                        | 1                        | 1                         | 3                        | -5.11                       | -5.97              | 84           |
| OH-dimer                 | C <sub>20</sub> H <sub>32</sub> O <sub>13</sub> | -0.55             | 3                                                  | 1                      | 1                        | 1                        | 1                         | 4                        | -7.52                       | -8.06              | 60           |
|                          | C <sub>20</sub> H <sub>34</sub> O <sub>8</sub>  | -1.05             | 4                                                  | 2                      | 0                        | 0                        | 1                         | 2                        | -2.66                       | -3.15              | --           |
|                          | C <sub>20</sub> H <sub>34</sub> O <sub>10</sub> | -0.9              | 4                                                  | 2                      | 0                        | 0                        | 1                         | 3                        | -5.07                       | -4.98              | --           |
|                          | C <sub>20</sub> H <sub>34</sub> O <sub>12</sub> | -0.75             | 4                                                  | 2                      | 0                        | 0                        | 1                         | 4                        | -7.47                       | -7.00              | --           |

<sup>1</sup>The functional groups used here were directly predicted from the proposed formation pathways in Figure 9 and did not include the intramolecular isomerization, like ring closure of unsaturated RO<sub>2</sub> (Berndt et al., 2016).

<sup>2</sup>At T=298K, the parameters in SIMPOL.1 were b<sub>0</sub> = 1.842, b<sub>4</sub> = -0.021, b<sub>7</sub> = -2.183, b<sub>8</sub> = -1.320, b<sub>9</sub> = -0.937, b<sub>26</sub> = -0.392, and b<sub>27</sub> = -2.440. The equation used for volatility calculation is  $\log_{10}P_{L,i}^0(T) = \sum_k v_{k,i} b_k(T)$ , where  $P_{L,i}^0(T)$  is the liquid vapor pressure of the compound.  $v_{k,i}$  is the number of groups of type k, and  $b_k(T)$  is the contribution by each group of type k. (Pankow and Asher, 2008).

## References cited

Berndt, T., Richters, S., Jokinen, T., Hyttinen, N., Kurtén, T., Otkjær, R. V., Kjaergaard, H. G., Stratmann, F., Herrmann, H., and Sipilä, M.: Hydroxyl radical-induced formation of highly oxidized organic compounds, *Nature communications*, 7, 13677, 2016.

Jokinen, T., Sipilä, M., Richters, S., Kerminen, V. M., Paasonen, P., Stratmann, F., Worsnop, D., Kulmala, M., Ehn, M., and Herrmann, H.: Rapid autoxidation forms highly oxidized RO<sub>2</sub> radicals in the atmosphere, *Angewandte Chemie International Edition*, 53, 14596-14600, 2014.

Kurten, A., Rondo, L., Ehrhart, S., and Curtius, J.: Calibration of a Chemical Ionization Mass Spectrometer for the Measurement of Gaseous Sulfuric Acid, *J Phys Chem A*, 116, 6375-6386, 2012.



Li, Y., Pöschl, U., and Shiraiwa, M.: Molecular corridors and parameterizations of volatility in the chemical evolution of organic aerosols, *Atmos Chem Phys*, 16, 3327-3344, 2016.

Pankow, J. F., and Asher, W. E.: SIMPOL. 1: a simple group contribution method for predicting vapor pressures and enthalpies of vaporization of multifunctional organic compounds, *Atmos Chem Phys*, 8, 2773-2796, 2008.
